1 Characterization of nonlinear receptive fields of visual neurons by convolutional neural network

2 (Short title: Nonlinear characterization of visual receptive fields using CNN)

3

4 Jumpei Ukita<sup>1\*</sup>, Takashi Yoshida<sup>1,2</sup>, and Kenichi Ohki<sup>1,2,3\*</sup>

5

6 1. Department of Physiology, The University of Tokyo School of Medicine, Bunkyo-ku, Tokyo, Japan

7 2. Department of Molecular Physiology, Graduate School of Medical Sciences, Kyushu University,

8 Higashi-ku, Fukuoka, Japan

9 3. International Research Center for Neurointelligence (WPI-IRCIN), The University of Tokyo,

10 Bunkyo-ku, Tokyo, Japan

11

12 \* Corresponding authors

13 E-mail: [kohki@m.u-tokyo.ac.jp](mailto:kohki@m.u-tokyo.ac.jp) (KO), [jukita@m.u-tokyo.ac.jp](mailto:jukita@m.u-tokyo.ac.jp) (JU)

14

## 15 **Abstract**

16 A comprehensive understanding of the stimulus-response properties of individual neurons is necessary to  
17 crack the neural code of sensory cortices. However, a barrier to achieving this goal is the difficulty of  
18 analyzing the nonlinearity of neuronal responses. In computer vision, artificial neural networks, especially  
19 convolutional neural networks (CNNs), have demonstrated state-of-the-art performance in image  
20 recognition by capturing the higher-order statistics of natural images. Here, we incorporated CNN for  
21 encoding models of neurons in the visual cortex to develop a new method of nonlinear response  
22 characterization, especially nonlinear estimation of receptive fields (RFs), without assumptions regarding  
23 the type of nonlinearity. Briefly, after training CNN to predict the visual responses of neurons to natural  
24 images, we synthesized the RF image such that the image would predictively evoke a maximum response  
25 ("maximization-of-activation" method). We first demonstrated the proof-of-principle using a dataset of  
26 simulated cells with various types of nonlinearity, revealing that CNN could be used to estimate the  
27 nonlinear RF of simulated cells. In particular, we could visualize various types of nonlinearity underlying  
28 the responses, such as shift-invariant RFs or rotation-invariant RFs. These results suggest that the method  
29 may be applicable to neurons with complex nonlinearities, such as rotation-invariant neurons in higher  
30 visual areas. Next, we applied the method to a dataset of neurons in the mouse primary visual cortex (V1)  
31 whose responses to natural images were recorded via two-photon  $\text{Ca}^{2+}$  imaging. We could visualize  
32 shift-invariant RFs with Gabor-like shapes for some V1 neurons. By quantifying the degree of  
33 shift-invariance, each V1 neuron was classified as either a shift-variant (simple) cell or shift-invariant  
34 (complex-like) cell, and these two types of neurons were not clustered in cortical space. These results  
35 suggest that the novel CNN encoding model is useful in nonlinear response analyses of visual neurons and  
36 potentially of any sensory neurons.

37

## 38 **Author summary**

39 A goal of sensory neuroscience is to comprehensively understand the stimulus-response properties of  
40 neuronal populations. However, a barrier to achieving this goal is the difficulty of analyzing the

41 nonlinearity of neuronal responses, and existing methods for nonlinear response analyses are often  
42 designed to address specific types of nonlinearity of responses. In this study, we present a novel  
43 assumption-free method for nonlinear characterization of visual responses, especially nonlinear estimation  
44 of receptive fields (RFs), using a convolutional neural network (CNN), which has achieved state-of-the-art  
45 performance in computer vision. The proposed method was validated as follows. First, when trained to  
46 predict neuronal responses to natural images, the model yielded the best prediction accuracy among several  
47 machine-learning-based encoding models. Second, nonlinear RFs were successfully visualized from the  
48 trained CNN. Third, the shift-invariance of the responses, a well-known nonlinear property in V1 complex  
49 cells, was quantified from the visualized RFs. These results support the efficacy of a CNN encoding model  
50 for nonlinear response analyses that does not require explicit assumptions regarding the nonlinearity of  
51 neuronal responses. This study will contribute to the elucidation of nonlinear computations performed in  
52 neurons in the visual cortex and possibly any sensory cortex.

53

## 54 **Introduction**

55 A goal of sensory neuroscience is to comprehensively understand the stimulus-response properties of  
56 neuronal populations. In the visual cortex, such properties were first characterized by Hubel and Wiesel,  
57 who discovered the orientation and direction selectivity of simple cells in the primary visual cortex (V1)  
58 using simple bar stimuli [1]. Later studies revealed that the responses of many visual neurons, including  
59 even simple cells [2–5], display nonlinearity, such as shift-invariance in V1 complex cells [6]; size,  
60 position, and rotation-invariance in inferotemporal cortex [7–9]; and viewpoint-invariance in a face patch  
61 [10]. Nevertheless, nonlinear response analyses of visual neurons have been limited thus far, and existing  
62 analysis methods are often designed to address specific types of nonlinearity underlying the neuronal  
63 responses. For example, the spike-triggered average [11] assumes linearity; moreover, the second-order  
64 Wiener kernel [12] and spike-triggered covariance [13–15] address second-order nonlinearity at most. In  
65 this study, we aim to analyze visual neuronal responses using an encoding model that does not assume the  
66 type of nonlinearity.

67           An encoding model that is useful for nonlinear response analyses of visual neurons must  
68 capture the nonlinear stimulus-response relationships of neurons. Thus, the model should be able to predict  
69 neuronal responses to stimulus images with high accuracy [16] even if the responses are nonlinear. In  
70 addition, the features that the encoding model represents should be visualized at least in part so that we can  
71 understand the neural computations underlying the responses. Artificial neural networks are promising  
72 candidates that may meet these criteria. Neural networks are mathematically universal approximators in  
73 that even one-hidden-layer neural network with many hidden units can approximate any smooth function  
74 [17]. In computer vision, neural networks trained with large-scale datasets have yielded state-of-the-art and  
75 sometimes human-level performance in digit classification [18], image classification [19], and image  
76 generation [20], demonstrating that neural networks, especially convolutional neural networks (CNNs)  
77 [21,22], capture the higher-order statistics of natural images through hierarchical information processing.  
78 In addition, recent studies in computer vision have provided techniques to extract and visualize the features  
79 learned in neural networks [23–26].

80           Several previous studies have used artificial neural networks as encoding models of visual  
81 neurons. These studies showed that artificial neural networks are highly capable of predicting neuronal  
82 responses with respect to low-dimensional stimuli such as bars and textures [27,28] or to complex stimuli  
83 such as natural stimuli [29–35]. Furthermore, receptive fields (RFs) were visualized by the principal  
84 components of the network weights between the input and hidden layer [29], by linearization [31], and by  
85 inversion of the network to evoke at most 80% of maximum responses [32]. However, these indirect RFs  
86 are not guaranteed to evoke the highest response of the target neuron.

87           In this study, we first investigated whether nonlinear RFs could be directly estimated by CNN  
88 encoding models (Fig 1) using a dataset of simulated cells with various types of nonlinearities. We  
89 confirmed that CNN yielded the best accuracy among several encoding models in predicting visual  
90 responses to natural images. Moreover, by synthesizing the image such that it would predictively evoke a  
91 maximum response ("maximization-of-activation" method), nonlinear RFs could be accurately estimated.  
92 Specifically, by repeatedly estimating RFs for each cell, we could visualize various types of nonlinearity  
93 underlying the responses without any explicit assumptions, suggesting that this method may be applicable

94 to neurons with complex nonlinearities, such as rotation-invariant neurons in higher visual areas. Next, we  
95 applied the same procedures to a dataset of mouse V1 neurons, showing that CNN again yielded the best  
96 prediction accuracy among several encoding models and that shift-invariant RFs with Gabor-like shapes  
97 could be estimated for some cells from the CNNs. Furthermore, by quantifying the degree of  
98 shift-invariance of each cell using the estimated RFs, we classified V1 neurons as shift-variant (simple)  
99 cells and shift-invariant (complex-like) cells. Finally, these cells were not spatially clustered in cortical  
100 space. These results verify that nonlinear RFs of visual neurons can be characterized using CNN encoding  
101 models.

102

## 103 **Results**

### 104 **Nonlinear RFs could be estimated by CNN encoding models for simulated cells with** 105 **various types of nonlinearities.**

106 We generated a dataset comprising the stimulus natural images (2200 images) and the corresponding  
107 responses of simulated cells. To investigate the ability of CNN to handle various types of nonlinearities, we  
108 incorporated various basic nonlinearities for the data generation, including rectification, shift-invariance,  
109 and in-plane rotation-invariance, which were found in V1 simple cells [2], V1 complex cells [6], and  
110 inferotemporal cortex [9], respectively. We generated the responses of simple cells ( $N = 30$ ), complex cells  
111 ( $N = 70$ ), and rotation-invariant cells ( $N = 10$ ) using the linear-nonlinear model [2], energy model [36,37],  
112 and rotation-invariant model, respectively (Figs 2A, 2B, and 3A; see Materials and Methods for details).  
113 The responses were generated using one Gabor-shaped filter for a simple cell, two phase-shifted  
114 Gabor-shaped filters for a complex cell, and 36 rotated Gabor-shaped filters for a rotation-invariant cell.  
115 We also added some noise sampled from a Gaussian distribution such that the trial-to-trial variability of  
116 simulated data was similar to that of real data.

117 We first used a dataset of simulated simple cells and complex cells and trained the CNN for  
118 each cell to predict responses with respect to the natural images (Fig 1). For comparison, we also  
119 constructed the following types of encoding models: an L1-regularized linear regression model (Lasso),

120 L2-regularized linear regression model (Ridge), support vector regression model (SVR) with a radius basis  
121 function kernel, and hierarchical structural model (HSM) [31]. The prediction accuracy, defined as the  
122 Pearson correlation coefficient between the predicted responses and actual responses in a 5-fold  
123 cross-validation manner, of CNN was high and better than that of other models for both simple cells and  
124 complex cells (Fig 2C), ensuring that the stimulus-response relationships of these cells were successfully  
125 captured by CNN.

126           Next, we visualized the RF of each cell using the maximization-of-activation approach (see  
127 Materials and Methods) [23,24] where the RF was regarded as the image that evoked the highest activation  
128 of the output layer of the trained CNN. We performed this RF estimation 100 times independently for each  
129 cell, utilizing the empirical fact that an independent iteration of RF estimation processes creates different  
130 RF images by finding different maxima [23]. Fig 2D and 2F show 20 out of the 100 RF images estimated  
131 by the trained CNN (CNN RF images) for a representative simple cell and complex cell, respectively. The  
132 predicted responses with respect to these RF images were all > 99% of the maximum response in the actual  
133 data of each cell, ensuring that the activations of the CNN output layers were indeed maximized. All  
134 visualized RF images had clearly segregated ON and OFF subregions, and the structure was close to the  
135 Gabor-shaped filters used in the response generations (Fig 2D vs. Fig 2A and Fig 2F vs. Fig 2B).  
136 Furthermore, when RF images were compared within a cell, RF images of cell #29 had ON and OFF  
137 subregions in nearly identical positions, while some RF images of cell #31 were shifted in relation to one  
138 another. These observations are consistent with the assumption that cell #29 is a simple cell and cell #31 is  
139 a complex cell.

140           For complex cells, we expect that RF estimation using linear methods would fail to generate an  
141 image with clearly segregated ON and OFF subregions, whereas nonlinear RF estimation would not [14].  
142 Thus, the similarity between a linearly estimated RF image (linear RF) and a nonlinearly estimated RF  
143 image is expected to be low for complex cells. We performed linear RF estimations following a previous  
144 study [38]. Although the linear RF image and CNN RF image were similar for cell #29 (Fig 2E), the linear  
145 RF image for cell #31 was ambiguous, lacked clear subregions, and was in sharp contrast to the CNN RF  
146 image (Fig 2G). These results are again consistent with the assumption that cell #29 is a simple cell and

147 cell #31 is a complex cell.

148           Next, we comprehensively analyzed the RFs of populations of simulated simple cells and  
149 complex cells. Cells with a CNN prediction accuracy  $\leq 0.3$  were omitted from the analyses (Fig 2C). First,  
150 the similarity between a linear RF image and CNN RF image, measured as the maximum normalized  
151 pixelwise dot product between a linear RF image and 100 CNN RF images, was distinctly different  
152 between simple cells and complex cells (Fig 2J), reflecting different degrees of nonlinearity. Second, the  
153 accuracy of Gabor-kernel fitting of the CNN RF image, measured as the pixelwise Pearson correlation  
154 coefficient between a CNN RF image and the fitted Gabor kernel, was high among all analyzed cells (Fig  
155 2H), confirming that the estimated RFs had a shape similar to a Gabor kernel. Third, the maximum  
156 similarity between each filter used in the response generation and 100 CNN RF images were high for both  
157 simple cells and complex cells (Fig 2I). Fourth, the orientations of the CNN RF images, estimated by  
158 fitting them to Gabor kernels, were nearly identical to the orientations of the filters of the response  
159 generators (circular correlation coefficient [39] = 0.92; Fig 2K). These results suggest that the RFs  
160 estimated by the CNN encoding models had similar structure to the ground truth and that the  
161 shift-invariant property of complex cells was successfully visualized from iterative RF estimations.

162           We also performed similar analyses using a dataset of simulated rotation-invariant cells. When  
163 trained to predict the responses with respect to the natural images, CNNs again yielded high prediction  
164 accuracy (Fig 3B). Next, we estimated RFs using the maximization-of-activation approach independently  
165 1000 times for each cell. The predicted responses with respect to these RF images were all  $> 99\%$  of the  
166 maximum response in the actual data of each cell, ensuring that the activations of CNN output layers were  
167 indeed maximized. As shown in Fig 3C, the visualized RF images of cell #1 had Gabor shapes close to the  
168 filters used in the response generation (Fig 3A). In addition, some RF images were rotated in relation to  
169 one another, consistent with the rotation-invariant response property of this cell. Finally, we quantitatively  
170 compared the RFs (1000 RF images for each cell) and the filters of the response generator (36 filters for  
171 each cell). For each filter, the maximum similarity with 1000 CNN RF images was high (Fig 3D),  
172 suggesting that the estimated RFs had various orientations and similar structure to the ground truth. Thus,  
173 using the proposed RF estimation approach, RFs were successfully estimated by the CNN encoding

174 models, and various types of nonlinearity could be visualized from multiple RFs without assumptions,  
175 although the hyperparameters and layer structures of CNNs were unchanged across cells.

176

### 177 **CNN yielded the best accuracy for prediction of the visual response of V1 neurons.**

178 Next, we used a dataset comprising the stimulus natural images (200–2200 images) and corresponding real  
179 neuronal responses (N = 2465 neurons, 4 planes), which were recorded using two-photon Ca<sup>2+</sup> imaging  
180 from mouse V1 neurons. To investigate whether CNN was able to capture the stimulus-response  
181 relationships of V1 neurons, we trained the CNN for each neuron to predict the neuronal responses to the  
182 natural images (Fig 1). The prediction accuracy was again measured by the Pearson correlation coefficient  
183 between the predicted responses and actual responses of the held-out test data in a 5-fold cross-validation  
184 manner (N = 2455 neurons that were not used for the hyperparameter optimizations; see Materials and  
185 Methods). Comparison of the prediction accuracies among several types of encoding models revealed that  
186 CNN outperformed other models (Fig 4A), and the prediction of the CNNs were accurate (Fig 4B and 4C).  
187 These results show that the stimulus-response relationships of V1 neurons were successfully captured by  
188 CNN, demonstrating the efficacy of using CNN for further RF analyses of V1 neurons.

189

### 190 **Estimation of nonlinear RFs of V1 neurons from CNN encoding models.**

191 Next, we visualized the RF of each neuron by the maximization-of-activation approach (see Materials and  
192 Methods) [23,24]. Neurons with a CNN prediction accuracy  $\leq 0.3$  were omitted from this analysis (Fig 4B).  
193 The resultant RF images for two representative neurons are shown in Fig 5B. Both RF images have clearly  
194 segregated ON and OFF subregions and were well fitted with two-dimensional Gabor kernels (Fig 5C),  
195 consistent with known characteristics of simple cells and complex cells in V1 [14,40]. The accuracy of  
196 Gabor-kernel fitting, measured as the pixelwise Pearson correlation coefficient between the RF image and  
197 fitted Gabor kernel, was high among all analyzed neurons (median  $r = 0.77$ ; Fig 5E), suggesting that the  
198 RF images generated from the trained CNNs (CNN RF images) successfully captured the Gabor-like



199 structure of RFs observed in V1. We also performed linear RF estimations following a previous study [38].  
200 Although the linear RF image and CNN RF image were similar for neuron #639, the linear RF image for  
201 neuron #646 was ambiguous, lacked clear subregions, and was in sharp contrast to the CNN RF image (Fig  
202 5A and 5B), suggesting that neuron #639 would be linear and neuron #646 would be nonlinear. Supporting  
203 this idea, further analysis (see below) revealed that neuron #639 was a shift-variant (simple) cell, and  
204 neuron #646 was a shift-invariant (complex-like) cell. The similarity between a linear RF image and a  
205 CNN RF image, measured as the normalized pixelwise dot product between these two images, varied  
206 among all analyzed neurons (Fig 5D), reflecting the distributed nonlinearity of V1 neurons.

207

### 208 **Estimated RFs of some V1 neurons were shift-invariant.**

209 We then performed 100 independent CNN RF estimations for each V1 neuron to characterize the  
210 nonlinearity of RFs. We especially focused on the shift-invariance, the most well-studied nonlinearity in  
211 V1 complex cells [6]. Fig 6 shows 20 of the 100 CNN RF images for two representative neurons. The  
212 predicted responses with respect to these RF images were all  $> 99\%$  of the maximum response in the actual  
213 data of each neuron, ensuring that the activations of the CNN output layers were indeed maximized.  
214 Importantly, RF images of neuron #639 had ON and OFF subregions in nearly identical positions (Fig 6A).  
215 In contrast, some RF images of neuron #646 were horizontally shifted in relation to one another (Fig 6B),  
216 suggesting that neuron #646 is shift-invariant and could be a complex cell.

217

### 218 **Characterization of shift invariance from iteratively estimated RF images.**

219 To quantitatively understand the shift-invariance, we then developed predictive models of visual responses  
220 for each simulated complex cell and V1 neuron, termed simple model and complex model, inspired by the  
221 stimulus-response properties of simple and complex cells. In the simple model, the response to a stimulus  
222 was predicted as the normalized dot product between the stimulus image and an RF image. The RF image  
223 that yielded the best prediction accuracy was chosen and used for all stimulus images (Fig 7A). In contrast,

224 in the complex model, the response to each stimulus was predicted as the maximum of the normalized dot  
225 products between the stimulus image and several RF images (Fig 7B). Here, RF images used in these  
226 models were selected from 100 RF images as ones that were shifted to one another. If there was no shifted  
227 RF image, the complex model was identical to the simple model (see Materials and Methods). Fig 7 shows  
228 examples of predictions from the simple and complex models for V1 neuron #646. Although the response  
229 to one image (Stim 1) was predicted moderately well by both the simple model and complex model, the  
230 prediction for another image (Stim 2) by the simple model was far poorer than the prediction by the  
231 complex model. This difference is probably because the ON/OFF phase of the RF image used in the simple  
232 model (RF 4) did not match with that of Stim 2. On the other hand, the complex model had multiple RF  
233 images, and one RF image (RF 1) matched with Stim 2. These results suggest that the responses of this  
234 neuron are somewhat tolerant to phase shifts and that such complex cell-like properties were better  
235 captured by the complex model than by the simple model.

236 We then measured the prediction accuracy of each model for all stimulus images by the Pearson  
237 correlation coefficient between the predicted responses and actual responses. As expected, the accuracy of  
238 the complex model was better than that of the simple model for this neuron #646 (Fig 8A and 8B),  
239 reflecting its shift-invariant property (Figs 5, 6 and 7).

240 We compared the accuracy of the simple model and complex model for populations of V1  
241 neurons (Fig 8C), simulated simple cells, and simulated complex cells. We defined the complexness index  
242 for each cell by

$$243 \quad \text{Complexness} = \frac{ACC_{\text{complex}} - ACC_{\text{simple}}}{ACC_{\text{complex}}} \quad (1)$$

244 where  $ACC_{\text{simple}}$  and  $ACC_{\text{complex}}$  are the response prediction accuracy of the simple model and complex  
245 model, respectively. Cells with a Gabor fitting accuracy (Figs 2H and 5E)  $\leq 0.6$ ,  $ACC_{\text{simple}} < 0$ , or  
246  $ACC_{\text{complex}} < 0$  were omitted from this analysis. Then, we defined simple cells as cells with complexness  $\leq$   
247 0 and complex-like cells as cells with complexness  $> 0$ . The sensitivity (recall) of this classification for  
248 simulated data was 89% for simple cells and 85% for complex cells (Fig 2L), ensuring the validity of this  
249 classification. In addition, the ratio of complex-like cells (26%, 258/997 neurons; Fig 8D and 8E) among

250 V1 neurons was consistent with that in a previous study [41].

251 We also compared complexness with other indices of linearity and nonlinearity using a dataset  
252 of V1 neurons. First, linear prediction accuracy, measured as the prediction accuracy of the L1-regularized  
253 linear regression model (Lasso), significantly anti-correlated with complexness for complex-like cells (Fig  
254 8F) ( $r = -0.35$ ,  $p < 0.001$ ,  $N = 258$ ; Student's t-test), suggesting that the linear regression models could not  
255 accurately predict the responses of neurons with high complexness. Similarity between linear RF images  
256 and CNN RF images also anti-correlated significantly with complexness (Fig 8G) ( $r = -0.35$ ,  $p < 0.001$ ,  $N$   
257  $= 258$ ; Student's t-test), suggesting that linear RFs could not accurately capture the RFs of neurons with  
258 high complexness. Furthermore, the nonlinearity index ((CNN prediction accuracy – Lasso prediction  
259 accuracy) / CNN prediction accuracy; see Materials and Methods) significantly correlated with  
260 complexness (Fig 8H) ( $r = 0.34$ ,  $p < 0.001$ ,  $N = 258$ , Student's t-test), suggesting that the nonlinearity of  
261 V1 neurons was at least in part introduced by the nonlinearity of complex-like cells.

262

### 263 **Simple cells and complex-like cells were not spatially clustered in V1.**

264 Finally, we tested whether simple cells and complex-like cells were spatially organized in the cortical  
265 space. We first investigated the spatial structure of complexness by comparing the difference in  
266 complexness with the cortical distance between all neuron pairs ( $N = 129451$  neuron pairs). We found no  
267 correlation between complexness and cortical distance ( $r = -0.01$ ), suggesting no distinct spatial  
268 organization of complexness (Fig 9A left and B). We also calculated the cortical distances of all simple  
269 cell-simple cell pairs and complex-like cell-complex-like cell pairs. The cumulative distributions of these  
270 distances, normalized by the area, were both within the first and 99<sup>th</sup> percentiles of the position-permuted  
271 simulations (1000 times for each plane; see Materials and Methods for the permutations), demonstrating no  
272 cluster organization of simple cells or complex-like cells (Fig 9 right and 9B).

273

## 274 **Discussion**

### 275 **Estimation of nonlinear RFs from CNN encoding models.**

276 We first revealed that the accuracy of CNN in predicting responses to natural images was high for both  
277 simulated cells and V1 neurons (Figs 2C, 3B, 4B). This finding is not surprising in light of the recent  
278 successes of artificial neural networks, especially CNN, in computer vision [18–20]. Such successes could  
279 be attributed to the ability of CNN to acquire sophisticated statistics of high-dimensional data [42].  
280 Likewise, the high prediction accuracy of CNN shown in this study is possibly due to its ability to capture  
281 higher-order nonlinearity between stimulus images and responses. Notably, the prediction accuracy of  
282 CNN was high even though the hyperparameters and layer structures of CNNs were identical for all types  
283 of cells, suggesting that CNN might be used as a general-purpose encoding model of visual neurons.

284           Using simulated cells, we showed that nonlinear RFs could be accurately estimated by CNN  
285 encoding models by the maximization-of-activation approach. In particular, various types of response  
286 nonlinearity could be visualized, including RFs with different phases for complex cells (Figs 2D, 2F) and  
287 RFs with different orientations for rotation-invariant cells (Fig 3C). One advantage of this RF estimation  
288 method is that it does not require an explicit assumption regarding the nonlinearities of RFs, whereas most  
289 methods for nonlinear RF estimation in previous studies do. Second-order Wiener kernel [12] and  
290 spike-triggered covariance [13–15] are capable of estimating RFs with second-order nonlinearity at most,  
291 and Fourier-based methods [43,44] estimate RFs that are linearized in the Fourier domain. The second  
292 advantage is that our method can directly visualize the image that is predicted to evoke the highest  
293 response of the target cell, in contrast to previously proposed RF estimations from artificial neural  
294 networks [29,31,32]. As suggested in [45], the disadvantage of the maximization-of-activation approach is  
295 that it may produce unrealistic images even if the maximization of activation was successful because the  
296 candidate image space is extremely vast. To avoid this issue, we constrained the candidate image space to  
297 natural images by using  $L_p$ -norm and total variance regularizations. Although the hyperparameters of  
298 regularizations were fixed across all analyzed cells, these regularizations worked well when considering  
299 the quality of the resultant RF images.

300 We then applied the RF estimation method to a dataset of V1 neurons and revealed that  
301 shift-invariant RFs could be estimated for complex-like cells from CNNs. Although direct quantification of  
302 the shift-invariant property of each cell from these RF images (e.g., by calculating the maximum shift  
303 distance orthogonal to the Gabor orientation) is indeed possible, it could lead to incorrect conclusions since  
304 the prediction accuracies of CNNs were imperfect (Figs 2C and 4B). For example, a CNN trained with low  
305 accuracy for a simple cell might not accurately implement the stimulus-response relationship of this cell  
306 and might accidentally generate some shifted RF images. Instead, the complexness was calculated as the  
307 difference in accuracies of the simple model and complex model (Figs 7 and 8) so that the complexness  
308 reflects the stimulus-response statistics of the data.

309

## 310 **Association between animal vision and deep learning.**

311 Although artificial neural networks and cortical neural networks have much in common [46], the former  
312 might not be an exact *in silico* implementation of the latter (e.g., the learning algorithms discussed in [47]).  
313 However, recent studies have suggested that the representations of CNNs and the activity of the visual  
314 cortex share hierarchical similarities [48–52]. These studies raise the possibility that the CNN encoding  
315 model could be applicable to neurons with complex nonlinearities, such as rotation-invariant neurons in the  
316 inferotemporal cortex [9]. Thus, the CNN encoding model and nonlinear RF characterization proposed in  
317 this paper will contribute to future studies of neural computations not only in V1 but also in higher visual  
318 areas.

319

## 320 **Materials and methods**

### 321 **Acquisition of neural data**

322 All experimental procedures were performed using C57BL/6 male mice (N = 3; Japan SLC, Hamamatsu,  
323 Shizuoka, Japan), which were approved by the Animal Care and Use Committee of Kyushu University and  
324 the University of Tokyo. Anesthesia was induced and maintained with isoflurane (5% for induction, 1.5%

325 during surgery, and ~0.5% during imaging with a sedation of ~0.5 mg/kg chlorprothixene; Sigma-Aldrich,  
326 St Louis, MO, USA). After the skin was removed from the head, a custom-made metal head plate was  
327 attached to the skull with dental cement (Super Bond; Sun Medical, Moriyama, Shiga, Japan), and a  
328 craniotomy was made over V1 (center position: 0–1 mm anterior from lambda, +2.5–3 mm lateral from  
329 midline). Then, 0.8 mM Oregon green BAPTA-1 (OGB-1; Life Technologies, Grand Island, NY, USA),  
330 dissolved with 10% Pluronic (Life Technologies) and 25  $\mu$ M sulforhodamine 101 (SR101; Sigma-Aldrich)  
331 was pressure-injected using Picospritzer III (Parker Hannifin, Cleveland, OH, USA) approximately 400  
332  $\mu$ m below the cortical surface. The craniotomy was sealed with a coverslip and dental cement.

333           Neuronal activity was recorded using two-photon microscopy (A1R MP; Nikon, Minato-ku,  
334 Tokyo, Japan) with a 25 $\times$  objective lens (NA = 1.1; PlanApo, Nikon) and Ti:Sapphire mode-locked laser  
335 (Mai Tai DeepSee; Spectra Physics, Santa Clara, CA, USA). OGB-1 and SR101 were both excited at a  
336 wavelength of 920 nm, and their emissions were filtered at 525/50 nm and 629/56 nm, respectively.  
337 507 $\times$ 507  $\mu$ m or 338 $\times$ 338  $\mu$ m images were obtained at 30 Hz using a resonant scanner with a  
338 512 $\times$ 512-pixel resolution.

339           Visual stimuli were presented using PsychoPy [53] on a 32-inch LCD monitor (Samsung  
340 Electronics, Yeongtong, Suwon, South Korea) at a refresh rate of 60 Hz. Stimulus presentation was  
341 synchronized with imaging using transistor-transistor logic signal of image acquisition timing and its  
342 counter board (USB-6501, National Instruments, Austin, TX, USA).

343           First, the retinotopic position was determined using moving grating patches (contrast: 99.9%,  
344 spatial frequency: 0.04 cycles/degree, temporal frequency: 2 Hz). We first determined the coarse  
345 retinotopic position by presenting a grating patch with a 50-degree diameter at each 5 $\times$ 3 position covering  
346 the entire monitor. Then, a grating patch with a 20-degree diameter was presented at each 4 $\times$ 4 position  
347 covering an 80 $\times$ 80-degree space to fine-tune the position. The retinotopic position was defined as the  
348 position with the highest response.

349           Natural images (200, 1200, or 2200 images, 512 $\times$ 512 pixels) were obtained from the van  
350 Hateren Database [54] and McGill Calibrated Colour Image Database [55]. After each image was

351 gray-scaled, it was preprocessed such that its contrast was 99.9% and its mean intensity across pixels was  
352 at an intensity level of approximately 50%, and then masked with a circle with a 60-degree diameter. The  
353 stimulus presentation protocol consisted of 3–12 sessions. In one session, images were ordered  
354 pseudo-randomly, and each image was flashed three times in a row. Each flash was presented for 200 ms  
355 with 200-ms intervals between flashes in which a gray screen was presented.

356

### 357 **Acquisition of simulated data**

358 The following types of artificial cells were simulated in this study: simple, complex, and rotation-invariant  
359 cells. A simple cell was modeled using a "linear-nonlinear" cascade formulated as shown below where the  
360 response to a stimulus was defined as the dot product between the stimulus image  $s$  and a Gabor-shaped  
361 filter  $f_i$ , followed by a rectifying nonlinearity [2] and a Gaussian noise (Fig 2A).

$$362 \quad R_{simple} = \max(s * f_1, 0) + noise \quad (2)$$

363 A complex cell was modeled using an energy model with two subunits [36,37]. In this model,  
364 each subunit calculated the dot product between the stimulus image  $s$  and a Gabor-shaped filter  $f_1, f_2$ . Then,  
365 the outputs of these two subunits were squared, summed together, and the squared root was taken. Finally,  
366 a Gaussian noise was added to define the response (Fig 2B). Here, the Gabor-shaped filters used in this  
367 model had identical amplitude, position, size, spatial frequency, and orientation; the phase was shifted by  
368 90 degrees. Note that this procedure, formulated as follows, can also be viewed as a  
369 "linear-nonlinear-linear-nonlinear" cascade [30,56].

$$370 \quad R_{complex} = \sqrt{(s * f_1)^2 + (s * f_2)^2} + noise \quad (3)$$

371 A rotation-invariant cell was modeled using 36 subunits. The  $i$ -th subunit ( $1 \leq i \leq 36$ ) calculated  
372 the dot product between the stimulus image  $s$  and a Gabor-shaped filter  $f_i$ . After the maximum of the  
373 outputs of the subunits was taken, a Gaussian noise was added to define the response (Fig 3A). Here, the  
374 Gabor-shaped filters used in this model  $f_i$  had identical amplitude, position, size, spatial frequency, and

375 phase; the orientation of the  $i$ -th subunit was  $5(i - 1)$  degree.

$$376 \quad R_{\text{rotation-invariant}} = \max(s * f_i) + \text{noise} \quad (4)$$

377 We simulated 30 simple cells, 70 complex cells, and 10 rotation-invariant cells. For each cell  
378 simulation, we performed 4 trials with a different random noise. The stimuli used in these three models  
379 were identical to the stimuli used in the acquisition of real neural data (2200 images), which were  
380 down-sampled to  $10 \times 10$  pixels. The Gabor-shaped filter used in these models, a product of a  
381 two-dimensional Gaussian envelope and a sinusoidal wave, was formulated as follows:

$$382 \quad G(x, y) = A \exp\left(-\left(\frac{x'^2}{2\sigma_1^2} + \frac{y'^2}{2\sigma_2^2}\right)\right) \cos(k_0 y' + \tau) \quad (5)$$

$$383 \quad x' = (x - x_0) \cos \theta + (y - y_0) \sin \theta \quad (6)$$

$$384 \quad y' = -(x - x_0) \sin \theta + (y - y_0) \cos \theta \quad (7)$$

385 where  $A$  is the amplitude,  $\sigma_1$  and  $\sigma_2$  are the standard deviations of the envelopes,  $k_0$  is the frequency,  $\tau$  is the  
386 phase,  $(x_0, y_0)$  is the center coordinate, and  $\theta$  is the orientation. The parameters for  $f_i$  of simple cells and  
387 complex cells were sampled from a uniform distribution over the following range:  $0.1 \leq x_0 / L_x \leq 0.9$ ,  $0.1 \leq$   
388  $y_0 / L_y \leq 0.9$ ,  $0 \leq A \leq 1$ ,  $0.1 \leq \sigma_1 / L_x \leq 0.2$ ,  $0.1 \leq \sigma_2 / L_y \leq 0.2$ ,  $\pi/3 \leq k_0 \leq \pi$ ,  $0 \leq \theta \leq 2\pi$ , and  $0 \leq \tau \leq 2\pi$ ,  
389 where  $L_x$  and  $L_y$  are the size of the stimulus image in the x and y dimension, respectively. The parameters  
390 for  $f_i$  of rotation-invariant cells were sampled from a uniform distribution over the following range:  $0 \leq A$   
391  $\leq 1$ ,  $0.15 \leq \sigma_1 / L_x \leq 0.2$ ,  $0.15 \leq \sigma_2 / L_y \leq 0.2$ ,  $\pi/3 \leq k_0 \leq 2/3 \pi$ , and  $0 \leq \tau \leq 2\pi$ .  $x_0$ ,  $y_0$  and  $\theta$  were set as  $L_x/2$ ,  
392  $L_y/2$ , and 0, respectively.

393 The noise was randomly sampled from a Gaussian distribution with a mean of zero and  
394 standard deviation of one, which resulted in trial-to-trial variability similar to that of real data.

395



## 396 **Data preprocessing**

397 Data analyses were performed using Matlab (Mathworks, Natick, MA, USA) and Python (2.7.13, 3.5.2,  
398 and 3.6.1). For real neural data, images were phase-corrected and aligned between frames [57]. To  
399 determine regions of interest (ROIs) for individual cells, images were averaged across frames, and slow  
400 spatial frequency components were removed from the frame-averaged image with a two-dimensional  
401 Gaussian filter whose standard deviation was approximately five times the diameter of the soma. ROIs  
402 were first automatically identified by template matching using a two-dimensional difference-of-Gaussian  
403 template and then corrected manually. SR101-positive cells, which were considered putative astrocytes  
404 [58], were removed from further analyses. The time course of the fluorescent signal of each cell was  
405 calculated by averaging the pixel intensities within an ROI. Out-of-focus fluorescence contamination was  
406 removed using a method described previously [59,60]. The neuronal response to each natural image was  
407 computed as the difference between averaged signals during the last 200 ms of presentation and averaged  
408 signals during the interval preceding the image presentation.

409 For both real data and simulated data, responses were averaged across all trials and scaled such  
410 that the values were between zero and one. Natural images used in further analyses were down-sampled to  
411 10×10 pixels. We finally standardized the distribution of each pixel by subtracting the mean and then  
412 dividing it by the standard deviation.

413

## 414 **Encoding models**

415 Encoding models were developed for each cell. An L1-regularized linear regression model (Lasso),  
416 L2-regularized linear regression model (Ridge), and SVR with radius basis function kernel were  
417 implemented using the Scikit-learn (0.18.1) framework [61]. The hyperparameters of these encoding  
418 models were optimized by exhaustive grid search with 5-fold cross-validation for data of 10 real V1  
419 neurons. The optimized hyperparameters were as follows: the regularization coefficients of Lasso and  
420 Ridge were 0.01 and  $10^4$ , respectively, and the kernel coefficient and penalty parameter of SVR were both  
421 0.01. The HSM was implemented as previously proposed [31] with hyperparameters identical to the ones

422 used in the study.

423 CNNs were implemented using the Keras (2.0.3 and 2.0.6) and Tensorflow (1.1.0 and 1.2.1)  
424 framework [62]. A CNN consisted of the input layer, several hidden layers (convolutional layer, pooling  
425 layer, or fully connected layer), and the output layer. The activation of a convolutional layer was defined as  
426 the rectified linear (ReLU) [63] transformation of a two-dimensional convolution of the previous layer  
427 activation. Here, the number of convolutional filters in one layer was 32, the size of each filter was (3, 3),  
428 the stride size was (1, 1), and valid padding was used. The activation of a pooling layer was 2×2  
429 max-pooling of the previous layer activation, and valid padding was also used. The activation of a fully  
430 connected layer was defined as the ReLU transformation of the weighted sum of the previous layer  
431 activation. If the previous layer had a two-dimensional shape, the activation was flattened to one  
432 dimension. The activation of the output layer was the sigmoidal transformation of the weighted sum of the  
433 previous layer. The size of the mini batch, dropout [64] rate, type of optimizer (stochastic gradient descent  
434 (SGD) or Adam [65]), learning rate decay coefficient of SGD, and number and types of hidden layers  
435 (convolutional, max-pooling, or fully connected) were optimized with 5-fold cross-validation for the data  
436 of 10 real V1 neurons. The optimized hyperparameters of CNN were as follows: the size of the mini batch  
437 was 5 or 30 (depending on the size of the dataset), the dropout rate of fully connected layers was 0.5, the  
438 optimizer was SGD, the learning rate decay coefficient was  $5 \times 10^{-5}$ , and the hidden layer structure was 4  
439 successive convolutional layers and one pooling layer, followed by one fully connected layer (Fig 1). Other  
440 hyperparameters were fixed.

441 The training was formulated as follows:

442 
$$W^* = \operatorname{argmin}_W \sum_{I,t} E(f(I; W), t) \quad (8)$$

443 where  $I$  is an image,  $t$  is the response,  $W$  is the parameters, and  $f$  is the model.  $E$  is the loss function defined  
444 as the mean squared error between the predicted responses and actual responses in the training dataset. The  
445 prediction accuracy was defined as the Pearson correlation coefficient between the predicted responses and  
446 actual responses. The training procedures of CNNs were as follows. First, the training data were  
447 subdivided into data used to update the parameters (90% of training data) and data used to monitor

448 generalization performances (10% of training data: validation set). After the parameters were initialized by  
449 sampling from Glorot uniform distributions [66], they were updated iteratively by backpropagation [67],  
450 which was performed to minimize the loss function in either a SGD or Adam manner. SGD was formulated  
451 as follows:

$$452 \quad v \leftarrow mv + \varepsilon \frac{\partial E(w)}{\partial w} \quad (9)$$

$$453 \quad w \leftarrow w - v \quad (10)$$

454 where  $w$  is the parameter we want to update,  $m$  is the momentum coefficient (0.9),  $v$  is the momentum  
455 variable,  $\varepsilon$  is the learning rate (initial learning rate was 0.1), and  $E(w)$  is the loss with respect to the batched  
456 data. Adam was formulated as previously suggested [65]. The training iterations were stopped upon  
457 saturation of the prediction accuracy for the validation set.

458 The response prediction accuracy of each encoding model was evaluated in a 5-fold  
459 cross-validation manner for each cell not used for hyperparameter optimizations. To quantify the  
460 nonlinearity of each cell, we defined a nonlinearity index for each cell by comparing the response  
461 prediction accuracy of Lasso and CNN in the following way:

$$462 \quad \text{nonlinearity index} = \frac{ACC_{CNN} - ACC_{Lasso}}{ACC_{CNN}} \quad (11)$$

463 where  $ACC_{CNN}$  and  $ACC_{Lasso}$  are the response prediction accuracy of CNN and Lasso, respectively.

464

## 465 **RF estimation**

466 Nonlinear RFs were estimated from trained CNNs using a regularized version of a  
467 maximization-of-activation approach [23,24]. Cells with a CNN prediction accuracy  $\leq 0.3$  were omitted  
468 from this analysis. First, CNN was trained using all data for each cell. Then, starting with a randomly  
469 initialized image, an image  $I$  was updated iteratively (10 times) by gradient ascent to maximize the  
470 following objective function  $E(I)$ :

471 
$$E(I) = f(I; W^*) - \frac{\lambda_1}{M} \|I\|_\alpha^\alpha - \frac{\lambda_2}{M} \int \left( \left( \frac{\partial I}{\partial x} \right)^2 + \left( \frac{\partial I}{\partial y} \right)^2 \right)^{\beta/2} dx dy \quad (12)$$

472 where  $f$  is the trained CNN model;  $W^*$  is the trained parameters, which is fixed in this procedure;  $\lambda_1$ ,  $\lambda_2$ ,  $\alpha$ ,  
 473 and  $\beta$  are the regularization parameters, which are fixed as 10, 2, 6, and 1, respectively; and  $M$  is the size  
 474 of the image. The second and third terms are regularization terms to minimize the  $\alpha$ -norm and total  
 475 variation [26] of the image, respectively. The RMSprop algorithm [68] was used as the gradient ascent  
 476 formulated as follows:

477 
$$I \leftarrow I + \frac{\alpha}{\sqrt{r + 10^{-7}}} \frac{\partial E(I)}{\partial I} \quad (13)$$

478 
$$r \leftarrow \gamma r + (1 - \gamma) \left( \frac{\partial E(I)}{\partial I} \right)^2 \quad (14)$$

479 where  $\gamma$  is the decay coefficient (0.95) and  $\alpha$  is the learning rate (1.0). The generated image was finally  
 480 processed such that its mean was zero and standard deviation was one (RF image). To confirm that the  
 481 generated RF image maximally activates the output layer, the whole process was repeated independently  
 482 until we generated an image to which the predicted response was high (for most cells, > 95% of the  
 483 maximum response of the actual data of each cell). Note that for representative cells (Figs 2D, 2E, 3C, and  
 484 4B), the predicted responses to the generated RF images were > 99% of the maximum response of the  
 485 actual data.

486 To quantitatively assess the generated RF images, we fitted each RF image with a Gabor kernel  
 487  $G(x, y)$  using sequential least-squares programming implemented in Scipy (0.19.0). A Gabor kernel, a  
 488 product of a two-dimensional Gaussian envelope and a sinusoidal wave, was formulated as follows:

489 
$$G(x, y) = A \exp \left( - \left( \frac{x'^2}{2\sigma_1^2} + \frac{y'^2}{2\sigma_2^2} \right) \right) \cos(k_0 y' + \tau) \quad (15)$$

490 
$$x' = (x - x_0) \cos \theta + (y - y_0) \sin \theta \quad (16)$$

491 
$$y' = -(x - x_0) \sin \theta + (y - y_0) \cos \theta \quad (17)$$

492 where  $A$  is the amplitude,  $\sigma_1$  and  $\sigma_2$  are the standard deviations of the envelopes,  $k_0$  is the frequency,  $\tau$  is the  
493 phase,  $(x_0, y_0)$  is the center coordinate, and  $\theta$  is the orientation. The goal of fitting was to minimize the  
494 pixelwise absolute error between the RF image and a Gabor kernel. This optimization was started with  
495 seven different initial  $x_0$  and seven different initial  $y_0$  to ensure that the optimization fell in the global  
496 minima. In addition, to create a reasonable Gabor kernel, we set bounds for some of the parameters:  $0 \leq x_0$   
497  $/L_x \leq 1$ ,  $0 \leq y_0/L_y \leq 1$ ,  $0 \leq \sigma_1/L_x \leq 0.2$ ,  $0 \leq \sigma_2/L_y \leq 0.2$ , and  $\pi/3 \leq k_0 \leq \pi$ , where  $L_x$  and  $L_y$  are the size of  
498 the RF image in the x and y dimension, respectively. The accuracy of Gabor fitting was evaluated by the  
499 pixelwise Pearson correlation coefficient between the original RF image and the fitted Gabor kernel.

500 Linear RF images were created by a regularized pseudoinverse method described previously  
501 [38]. The regularization parameter was optimized for each cell by exhaustive grid search in a 10-fold  
502 cross-validation manner. For each value in the grid, responses to the held-out test data were predicted using  
503 the created RF image. Prediction accuracy was calculated as the Pearson correlation coefficient between  
504 the predicted responses and actual responses. The linear RF image was created using the value with the  
505 highest prediction accuracy as the regularization parameter.

506

### 507 **Quantification of shift-invariance (complexness)**

508 To distinguish between simple cells and complex-like cells, we then created a "shifted image set", which  
509 contained CNN RF images that were shifted with respect to one another, selected from the 100 CNN RF  
510 images. For this purpose, a zero-mean normalized cross correlation (ZNCC) was calculated for every pair  
511 of RF images ( $I_1, I_2$ ):

512 
$$ZNCC(u, v) = \frac{\sum_y \sum_x (I_1(x + u, y + v) - \bar{I}_1)(I_2(x, y) - \bar{I}_2)}{\sqrt{\sum_y \sum_x (I_1(x + u, y + v) - \bar{I}_1)^2} \sqrt{\sum_y \sum_x (I_2(x, y) - \bar{I}_2)^2}} \quad (18)$$

513 where  $(u, v)$  is a pixel shift and  $\bar{I}_1$  is the mean of  $I_1$ . If the ZNCC was above 0.95 for a  $(u, v)$  pair  $((u, v)$

514  $\neq (0, 0)$ ), these two RF images were defined as shifted to each other by  $(u, v)$  pixels. Then, for each pair  
515 of shifted RF images, we calculated the shift distance as the maximum length of  $(u, v)$  vectors projected  
516 orthogonally to the Gabor orientation. Finally, starting with the two RF images with the largest shift  
517 distance, we iteratively collected RF images that were shifted from the already collected RF images to  
518 create the "shifted image set". If none of the 100 RF images were shifted to another, the "shifted image set"  
519 consisted of the RF image with the highest predicted response.

520 A simple model and complex model were created for each cell as follows (Fig 7). In the simple  
521 model, the response to a stimulus image was predicted as the normalized dot product between the stimulus  
522 image and one RF image selected from the "shifted image set". The RF image that yielded the best  
523 prediction accuracy was chosen and used for all stimulus images. In the complex model, the response to a  
524 single stimulus image was predicted as the maximum of the normalized dot products between the stimulus  
525 image and RF images in the "shifted image set". The RF image with the maximal dot product was selected  
526 for each stimulus image separately. The prediction accuracy for each model was quantified as the Pearson  
527 correlation coefficient between the predicted responses and actual responses among all stimulus-response  
528 datasets. Finally, the complexness index for each cell was defined by

529 
$$Complexness = \frac{ACC_{complex} - ACC_{simple}}{ACC_{complex}} \quad (19)$$

530 where  $ACC_{simple}$  and  $ACC_{complex}$  are the response prediction accuracy of the simple model and complex  
531 model, respectively. Cells with the Gabor fitting accuracy  $\leq 0.6$ ,  $ACC_{simple} < 0$ , or  $ACC_{complex} < 0$  were  
532 omitted from this analysis.

533

### 534 **Spatial organizations of simple cells and complex-like cells**

535 The spatial organizations of simple cells and complex-like cells were evaluated in two ways. First, for each  
536 pair of neurons, we calculated the in-between cortical distance and the difference in complexness. A  
537 relationship between the cortical distances and the complexness differences is indicative of a spatial  
538 organization [57]. Second, we calculated the cumulative distributions of the in-between cortical distances

539 for all pairs of simple cells and for all pairs of complex-like cells. To statistically evaluate the cumulative  
540 distributions, we permuted the cell positions 1000 times independently for each plane. For each  
541 permutation, cell positions of simple cells were randomly sampled from original cell positions of simple  
542 and complex-like cells. Other positions were allocated for complex-like cells. After the cell positions were  
543 determined, the cumulative distributions of the in-between cortical distances were calculated. After  
544 repeating this procedure independently 1000 times for each plane, the first and 99<sup>th</sup> percentiles of the  
545 permuted cumulative distributions were calculated for the significance levels.

546

## 547 **Acknowledgements**

548 We thank all members of the Ohki laboratory, especially Ms. T. Inoue, Y. Sono, A. Ohmori, A. Honda, and  
549 M. Nakamichi for animal care. This work was supported by grants from Brain Mapping by Integrated  
550 Neurotechnologies for Disease Studies (Brain/MINDS), Japan Agency for Medical Research and  
551 Development (AMED) (to K.O.); International Research Center for Neurointelligence (WPI-IRCN), Japan  
552 Society for the Promotion of Sciences (JSPS) (to K.O.); Core Research for Evolutionary Science and  
553 Technology (CREST), AMED (to K.O.); Strategic International Research Cooperative Program (SICP),  
554 AMED (to K.O.); JSPS KAKENHI (grant number 25221001 and 25117004 to K.O. and 15K16573 and  
555 17K13276 to T.Y.); the Ichiro Kanehara Foundation for the Promotion of Medical Sciences and Medical  
556 Care (to T.Y.); and the Uehara Memorial Foundation (to T.Y.). J.U. was supported by the Takeda Science  
557 Foundation and Masayoshi Son Foundation.

558

## 559 **Author contributions**

560 J.U., T.Y., and K.O. designed the study; T.Y. performed the experiments; J.U., T.Y., and K.O. analyzed the  
561 data; and J.U., T.Y., and K.O. wrote the paper.

562

## 563 **References**

- 564 1. Hubel DH, Wiesel TN. Receptive fields of single neurones in the cat's striate cortex. *J Physiol.*  
565 1959;148: 574–591. doi:10.1113/jphysiol.2009.174151
- 566 2. Movshon JA, Thompson ID, Tolhurst DJ. Spatial summation in the receptive fields of simple cells  
567 in the cat's striate cortex. *J Physiol.* 1978;283: 53–77. doi:10.1113/jphysiol.1978.sp012488
- 568 3. Dean AF, Tolhurst DJ. On the distinctness of simple and complex cells in the visual cortex of the  
569 cat. *J Physiol.* 1983;344: 305–325. Available: <http://www.ncbi.nlm.nih.gov/pubmed/6655583>
- 570 4. Tolhurst DJ, Dean AF. Spatial summation by simple cells in the striate cortex of the cat. *Exp Brain*  
571 *Res.* 1987;66: 607–620. doi:10.1007/BF00270694
- 572 5. DeAngelis GC, Ohzawa I, Freeman RD. Spatiotemporal organization of simple-cell receptive fields  
573 in the cat's striate cortex. II. Linearity of temporal and spatial summation. *J Neurophysiol.*  
574 1993;69: 1118–1135. Available: <http://www.ncbi.nlm.nih.gov/pubmed/8492152>
- 575 6. Hubel DH, Wiesel TN. Receptive fields, binocular interaction and functional architecture in the  
576 cat's visual cortex. *J Physiol.* 1962;160: 106–154. doi:10.1113/jphysiol.1962.sp006837
- 577 7. Ito M, Tamura H, Fujita I, Tanaka K. Size and position invariance of neuronal responses in  
578 monkey inferotemporal cortex. *J Neurophysiol.* 1995;73: 218–226. doi:10.1152/jn.1995.73.1.218
- 579 8. Brincat SL, Connor CE. Underlying principles of visual shape selectivity in posterior  
580 inferotemporal cortex. *Nat Neurosci.* 2004;7: 880–886. doi:10.1038/nn1278
- 581 9. Ratan Murty NA, Arun SP. A Balanced Comparison of Object Invariances in Monkey IT Neurons.  
582 *Eneuro.* 2017;4: ENEURO.0333-16.2017. doi:10.1523/ENEURO.0333-16.2017
- 583 10. Freiwald WA, Tsao DY. Functional Compartmentalization and Viewpoint Generalization Within  
584 the Macaque Face-Processing System. *Science* (80- ). 2010;330: 845–851.  
585 doi:10.1126/science.1194908
- 586 11. Jones JP, Palmer LA. The two-dimensional spatial structure of simple receptive fields in cat striate  
587 cortex. *J Neurophysiol.* 1987;58: 1187–1211. Available:  
588 <http://jn.physiology.org/content/58/6/1187#cite>  
589 <http://jn.physiology.org/content/58/6/1187.full>  
<http://www.ncbi.nlm.nih.gov/pubmed/3437330>
- 590 12. Emerson RC, Citron MC, Vaughn WJ, Klein SA. Nonlinear directionally selective subunits in  
591 complex cells of cat striate cortex. *J Neurophysiol.* 1987;58: 33–65. Available:



- 592 <http://www.ncbi.nlm.nih.gov/pubmed/3039079>
- 593 13. Touryan J, Lau B, Dan Y. Isolation of relevant visual features from random stimuli for cortical  
594 complex cells. *J Neurosci.* 2002;22: 10811–10818. doi:22/24/10811 [pii]
- 595 14. Touryan J, Felsen G, Dan Y. Spatial structure of complex cell receptive fields measured with  
596 natural images. *Neuron.* 2005;45: 781–791. doi:10.1016/j.neuron.2005.01.029
- 597 15. Rust NC, Schwartz O, Movshon JA, Simoncelli EP. Spatiotemporal elements of macaque V1  
598 receptive fields. *Neuron.* 2005;46: 945–956. doi:10.1016/j.neuron.2005.05.021
- 599 16. Carandini M, Demb JB, Mante V, Tolhurst DJ, Dan Y, Olshausen BA, et al. Do we know what the  
600 early visual system does? *J Neurosci.* 2005;25: 10577–10597.  
601 doi:10.1523/JNEUROSCI.3726-05.2005
- 602 17. Hornik K, Stinchcombe M, White H. Multilayer feedforward networks are universal approximators.  
603 *Neural Networks.* 1989;2: 359–366. doi:10.1016/0893-6080(89)90020-8
- 604 18. Hinton GE, Salakhutdinov RR. Reducing the dimensionality of data with neural networks. *Science*  
605 (80- ). 2006;313: 504–507. doi:10.1126/science.1127647
- 606 19. Krizhevsky A, Sutskever I, Hinton GE. ImageNet Classification with Deep Convolutional Neural  
607 Networks. In: Pereira F, Burges CJC, Bottou L, Weinberger KQ, editors. *Advances in Neural*  
608 *Information Processing Systems 25.* Curran Associates, Inc.; 2012. pp. 1097–1105. Available:  
609 [http://papers.nips.cc/paper/4824-imagenet-classification-with-deep-convolutional-neural-networks.](http://papers.nips.cc/paper/4824-imagenet-classification-with-deep-convolutional-neural-networks.pdf)  
610 pdf
- 611 20. Radford A, Metz L, Chintala S. Unsupervised Representation Learning with Deep Convolutional  
612 Generative Adversarial Networks. *International Conference on Learning Representations (ICLR).*  
613 2016. Available: <http://arxiv.org/abs/1511.06434>
- 614 21. Fukushima K. Neocognitron: A self-organizing neural network model for a mechanism of pattern  
615 recognition unaffected by shift in position. *Biol Cybern.* 1980;36: 193–202.  
616 doi:10.1007/BF00344251
- 617 22. LeCun Y, Boser BE, Denker JS, Henderson D, Howard RE, Hubbard WE, et al. Handwritten Digit  
618 Recognition with a Back-Propagation Network. In: Touretzky DS, editor. *Advances in Neural*  
619 *Information Processing Systems 2.* Morgan-Kaufmann; 1990. pp. 396–404. Available:  
620 <http://papers.nips.cc/paper/293-handwritten-digit-recognition-with-a-back-propagation-network.pdf>
- 621 23. Erhan D, Bengio Y, Courville A, Vincent P. Visualizing higher-layer features of a deep network.

- 622 Tech report, Univ Montr. 2009; 1–13. Available:  
623 <http://igva2012.wikispaces.asu.edu/file/view/Erhan+2009+Visualizing+higher+layer+features+of+a+deep+network.pdf>  
624
- 625 24. Simonyan K, Vedaldi A, Zisserman A. Deep Inside Convolutional Networks: Visualising Image  
626 Classification Models and Saliency Maps. International Conference on Learning Representations  
627 (ICLR) Workshop. 2014. Available: <http://arxiv.org/abs/1312.6034>
- 628 25. Zeiler MD, Fergus R. Visualizing and Understanding Convolutional Networks. European  
629 Conference on Computer Vision (ECCV). 2014. Available: <http://arxiv.org/abs/1311.2901>
- 630 26. Mahendran A, Vedaldi A. Understanding deep image representations by inverting them. IEEE  
631 Conference on Computer Vision and Pattern Recognition (CVPR). 2015.  
632 doi:10.1109/CVPR.2015.7299155
- 633 27. Lehky SR, Sejnowski TJ, Desimone R. Predicting responses of nonlinear neurons in monkey striate  
634 cortex to complex patterns. *J Neurosci*. 1992;12: 3568–3581. Available:  
635 [http://www.jneurosci.org/content/12/9/3568.short%5Cnhttp://www.ncbi.nlm.nih.gov/pubmed/1527](http://www.jneurosci.org/content/12/9/3568.short%5Cnhttp://www.ncbi.nlm.nih.gov/pubmed/1527596)  
636 596
- 637 28. Lau B, Stanley GB, Dan Y. Computational subunits of visual cortical neurons revealed by artificial  
638 neural networks. *Proc Natl Acad Sci U S A*. 2002;99: 8974–8979. doi:10.1073/pnas.122173799
- 639 29. Prenger R, Wu MCK, David S V., Gallant JL. Nonlinear V1 responses to natural scenes revealed  
640 by neural network analysis. *Neural Networks*. 2004;17: 663–679.  
641 doi:10.1016/j.neunet.2004.03.008
- 642 30. Vintch B, Movshon JA, Simoncelli EP. A Convolutional Subunit Model for Neuronal Responses in  
643 Macaque V1. *J Neurosci*. 2015;35: 14829–14841. doi:10.1523/JNEUROSCI.2815-13.2015
- 644 31. Antolík J, Hofer SB, Bednar JA, Mrsic-Flogel TD. Model Constrained by Visual Hierarchy  
645 Improves Prediction of Neural Responses to Natural Scenes. *PLOS Comput Biol*. 2016;12:  
646 e1004927. doi:10.1371/journal.pcbi.1004927
- 647 32. Kindel WF, Christensen ED, Zylberberg J. Using deep learning to reveal the neural code for  
648 images in primary visual cortex. arXiv:170606208. 2017; Available:  
649 <http://arxiv.org/abs/1706.06208>
- 650 33. Cadena SA, Denfield GH, Walker EY, Gatys LA, Tolias AS, Bethge M, et al. Deep convolutional  
651 models improve predictions of macaque V1 responses to natural images. bioRxiv. 2017; 201764.  
652 doi:10.1101/201764

- 653 34. Klindt DA, Ecker AS, Euler T, Bethge M. Neural system identification for large populations  
654 separating "what" and "where." *Advances in Neural Information Processing Systems (NIPS)*. 2017.  
655 Available: <https://nips.cc/Conferences/2017/Schedule?showEvent=9134>
- 656 35. Zhang Y, Lee TS, Li M, Liu F, Tang S. Convolutional neural network models of V1 responses to  
657 complex patterns. *bioRxiv*. 2018; doi:10.1101/296301
- 658 36. Adelson EH, Bergen JR. Spatiotemporal energy models for the perception of motion. *J Opt Soc*  
659 *Am A*. 1985;2: 284. doi:10.1364/JOSAA.2.000284
- 660 37. Körding KP, Kayser C, Einhäuser W, König P. How are complex cell properties adapted to the  
661 statistics of natural stimuli? *J Neurophysiol*. 2004;91: 206–12. doi:10.1152/jn.00149.2003
- 662 38. Smyth D, Willmore B, Baker GE, Thompson ID, Tolhurst DJ. The receptive-field organization of  
663 simple cells in primary visual cortex of ferrets under natural scene stimulation. *J Neurosci*.  
664 2003;23: 4746–4759. Available: <http://www.ncbi.nlm.nih.gov/pubmed/12805314>
- 665 39. Jammalamadaka, S R, Ambar S. *Topics in Circular Statistics*. World Scientific; 2001.
- 666 40. Jones JP, Palmer LA. An evaluation of the two-dimensional Gabor filter model of simple receptive  
667 fields in cat striate cortex. *J Neurophysiol*. 1987;58: 1233–1258. doi:citeulike-article-id:762473
- 668 41. Niell CM, Stryker MP. Highly selective receptive fields in mouse visual cortex. *J Neurosci*.  
669 2008;28: 7520–7536. doi:10.1523/JNEUROSCI.0623-08.2008
- 670 42. LeCun Y, Bengio Y, Hinton GE. Deep learning. *Nature*. 2015;521: 436–444.  
671 doi:10.1038/nature14539
- 672 43. David S V., Vinje WE, Gallant JL. Natural stimulus statistics alter the receptive field structure of  
673 v1 neurons. *J Neurosci*. 2004;24: 6991–7006. doi:10.1523/JNEUROSCI.1422-04.2004
- 674 44. David S V, Gallant JL. Predicting neuronal responses during natural vision. *Netw Comput Neural*  
675 *Syst*. 2005;16: 239–260. doi:10.1080/09548980500464030
- 676 45. Nguyen A, Yosinski J, Clune J. Deep neural networks are easily fooled: High confidence  
677 predictions for unrecognizable images. *IEEE Conference on Computer Vision and Pattern*  
678 *Recognition (CVPR)*. 2015. doi:10.1109/CVPR.2015.7298640
- 679 46. Hassabis D, Kumaran D, Summerfield C, Botvinick M. Neuroscience-Inspired Artificial  
680 Intelligence. *Neuron*. Elsevier Inc.; 2017;95: 245–258. doi:10.1016/j.neuron.2017.06.011
- 681 47. Bengio Y, Lee D-H, Bornschein J, Mesnard T, Lin Z. Towards Biologically Plausible Deep

- 682 Learning. arXiv:150204156. 2015; Available: <http://arxiv.org/abs/1502.04156>
- 683 48. Yamins DLK, Hong H, Cadieu CF, Solomon EA, Seibert D, DiCarlo JJ. Performance-optimized  
684 hierarchical models predict neural responses in higher visual cortex. *Proc Natl Acad Sci U S A*.  
685 2014;111: 8619–8624. doi:10.1073/pnas.1403112111
- 686 49. Khaligh-Razavi S-M, Kriegeskorte N. Deep Supervised, but Not Unsupervised, Models May  
687 Explain IT Cortical Representation. *PLoS Comput Biol*. 2014;10: e1003915.  
688 doi:10.1371/journal.pcbi.1003915
- 689 50. Cadieu CF, Hong H, Yamins DLK, Pinto N, Ardila D, Solomon EA, et al. Deep neural networks  
690 rival the representation of primate IT cortex for core visual object recognition. *PLoS Comput Biol*.  
691 2014;10: e1003963. doi:10.1371/journal.pcbi.1003963
- 692 51. Güçlü U, van Gerven MAJ. Deep Neural Networks Reveal a Gradient in the Complexity of Neural  
693 Representations across the Ventral Stream. *J Neurosci*. 2015;35: 10005–10014.  
694 doi:10.1523/JNEUROSCI.5023-14.2015
- 695 52. Horikawa T, Kamitani Y. Generic decoding of seen and imagined objects using hierarchical visual  
696 features. *Nat Commun. Nature Publishing Group*; 2017;8: 15037. doi:10.1038/ncomms15037
- 697 53. Peirce JW. Generating stimuli for neuroscience using PsychoPy. *Front Neuroinform*. 2008;2: 1–8.  
698 doi:10.3389/neuro.11.010.2008
- 699 54. van Hateren JH, van der Schaaf A. Independent component filters of natural images compared with  
700 simple cells in primary visual cortex. *Proc R Soc B Biol Sci*. 1998;265: 359–366.  
701 doi:10.1098/rspb.1998.0303
- 702 55. Olmos A, Kingdom FAA. A biologically inspired algorithm for the recovery of shading and  
703 reflectance images. *Perception*. 2004;33: 1463–1473. doi:10.1068/p5321
- 704 56. McFarland JM, Cui Y, Butts DA. Inferring Nonlinear Neuronal Computation Based on  
705 Physiologically Plausible Inputs. *PLoS Comput Biol*. 2013;9. doi:10.1371/journal.pcbi.1003143
- 706 57. Ohki K, Chung S, Ch'ng YH, Kara P, Reid RC. Functional imaging with cellular resolution reveals  
707 precise micro-architecture in visual cortex. *Nature*. 2005;433: 597–603. doi:10.1038/nature03274
- 708 58. Nimmerjahn A, Kirchhoff F, Kerr JND, Helmchen F. Sulforhodamine 101 as a specific marker of  
709 astroglia in the neocortex in vivo. *Nat Methods*. 2004;1: 31–37. doi:10.1038/nmeth706
- 710 59. Kerlin AM, Andermann ML, Berezovskii VK, Reid RC. Broadly Tuned Response Properties of  
711 Diverse Inhibitory Neuron Subtypes in Mouse Visual Cortex. *Neuron*. Elsevier Inc.; 2010;67:

- 712 858–871. doi:10.1016/j.neuron.2010.08.002
- 713 60. Hagihara KM, Murakami T, Yoshida T, Tagawa Y, Ohki K. Neuronal activity is not required for  
714 the initial formation and maturation of visual selectivity. *Nat Neurosci.* 2015;18: 1780–1788.  
715 doi:10.1038/nn.4155
- 716 61. Pedregosa F, Varoquaux G, Gramfort A, Michel V, Thirion B, Grisel O, et al. Scikit-learn:  
717 Machine Learning in Python. *J Mach Learn Res.* 2012;12: 2825–2830.  
718 doi:10.1007/s13398-014-0173-7.2
- 719 62. Abadi M, Agarwal A, Barham P, Brevdo E, Chen Z, Citro C, et al. TensorFlow: Large-Scale  
720 Machine Learning on Heterogeneous Distributed Systems. arXiv:160304467. 2016; Available:  
721 <http://arxiv.org/abs/1603.04467>
- 722 63. Nair V, Hinton GE. Rectified Linear Units Improve Restricted Boltzmann Machines. *International*  
723 *Conference on Machine Learning (ICML).* 2010.
- 724 64. Hinton GE, Srivastava N, Krizhevsky A, Sutskever I, Salakhutdinov RR. Improving neural  
725 networks by preventing co-adaptation of feature detectors. arXiv:12070580. 2012; Available:  
726 <http://arxiv.org/abs/1207.0580>
- 727 65. Kingma DP, Ba J. Adam: A Method for Stochastic Optimization. *International Conference on*  
728 *Learning Representations (ICLR).* 2014. Available: <http://arxiv.org/abs/1412.6980>
- 729 66. Glorot X, Bengio Y. Understanding the difficulty of training deep feedforward neural networks.  
730 *International Conference on Artificial Intelligence and Statistics (AISTATS).* 2010. pp. 249–256.  
731 doi:10.1.1.207.2059
- 732 67. Rumelhart DE, Hinton GE, Williams RJ. Learning representations by back-propagating errors.  
733 *Nature.* 1986;323: 533–536. doi:10.1038/323533a0
- 734 68. Hinton GE, Srivastava N, Swersky K. Lecture 6e-rmsprop: Divide the gradient by a running  
735 average of its recent magnitude. COURSERA Neural Networks Mach Learn. 2012; Available:  
736 [http://www.cs.toronto.edu/~tijmen/csc321/slides/lecture\\_slides\\_lec6.pdf](http://www.cs.toronto.edu/~tijmen/csc321/slides/lecture_slides_lec6.pdf)

737

738

739 **Figures**

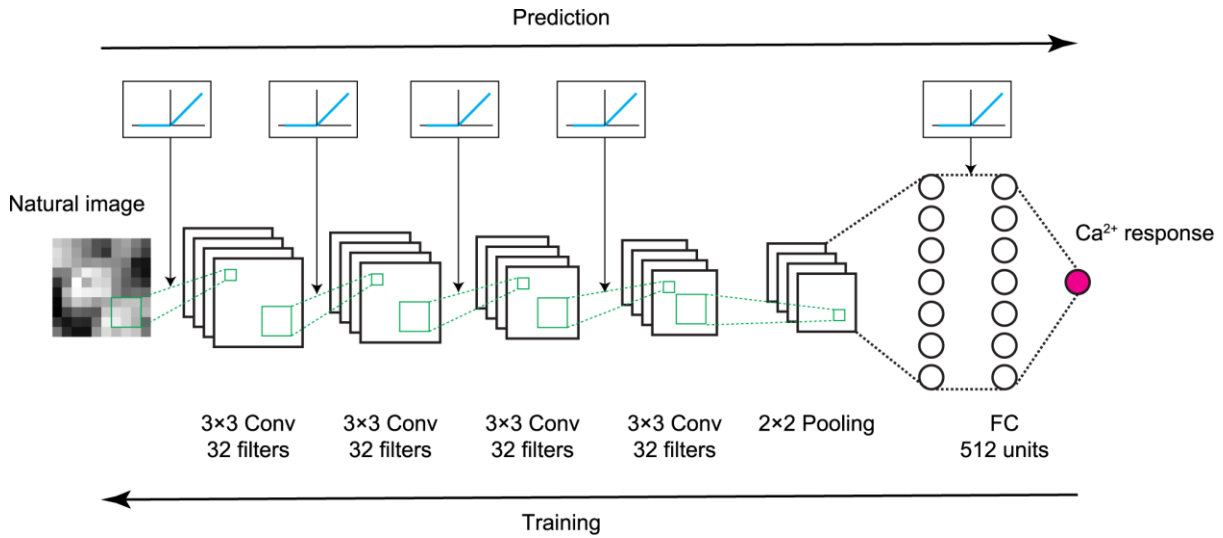

740

741 **Fig 1. Scheme of CNN encoding model.**

742 The Ca<sup>2+</sup> response to a natural image was predicted by convolutional neural network (CNN) consisting of  
743 4 successive convolutional layers, one pooling layer, one fully connected layer, and the output layer  
744 (magenta circle). See Materials and Methods for details. Briefly, a convolutional layer calculates a 3x3  
745 convolution of the previous layer followed by a rectified linear (ReLU) transformation. The pooling layer  
746 calculates max-pooling of 2x2 regions in the previous layer. The fully connected layer calculates the  
747 weighted sum of the previous layer followed by a ReLU transformation. The output layer calculates the  
748 weighted sum of the previous layer followed by a sigmoidal transformation. During training, parameters  
749 were updated by backpropagation to reduce the mean squared error between the predicted responses and  
750 actual responses.

751

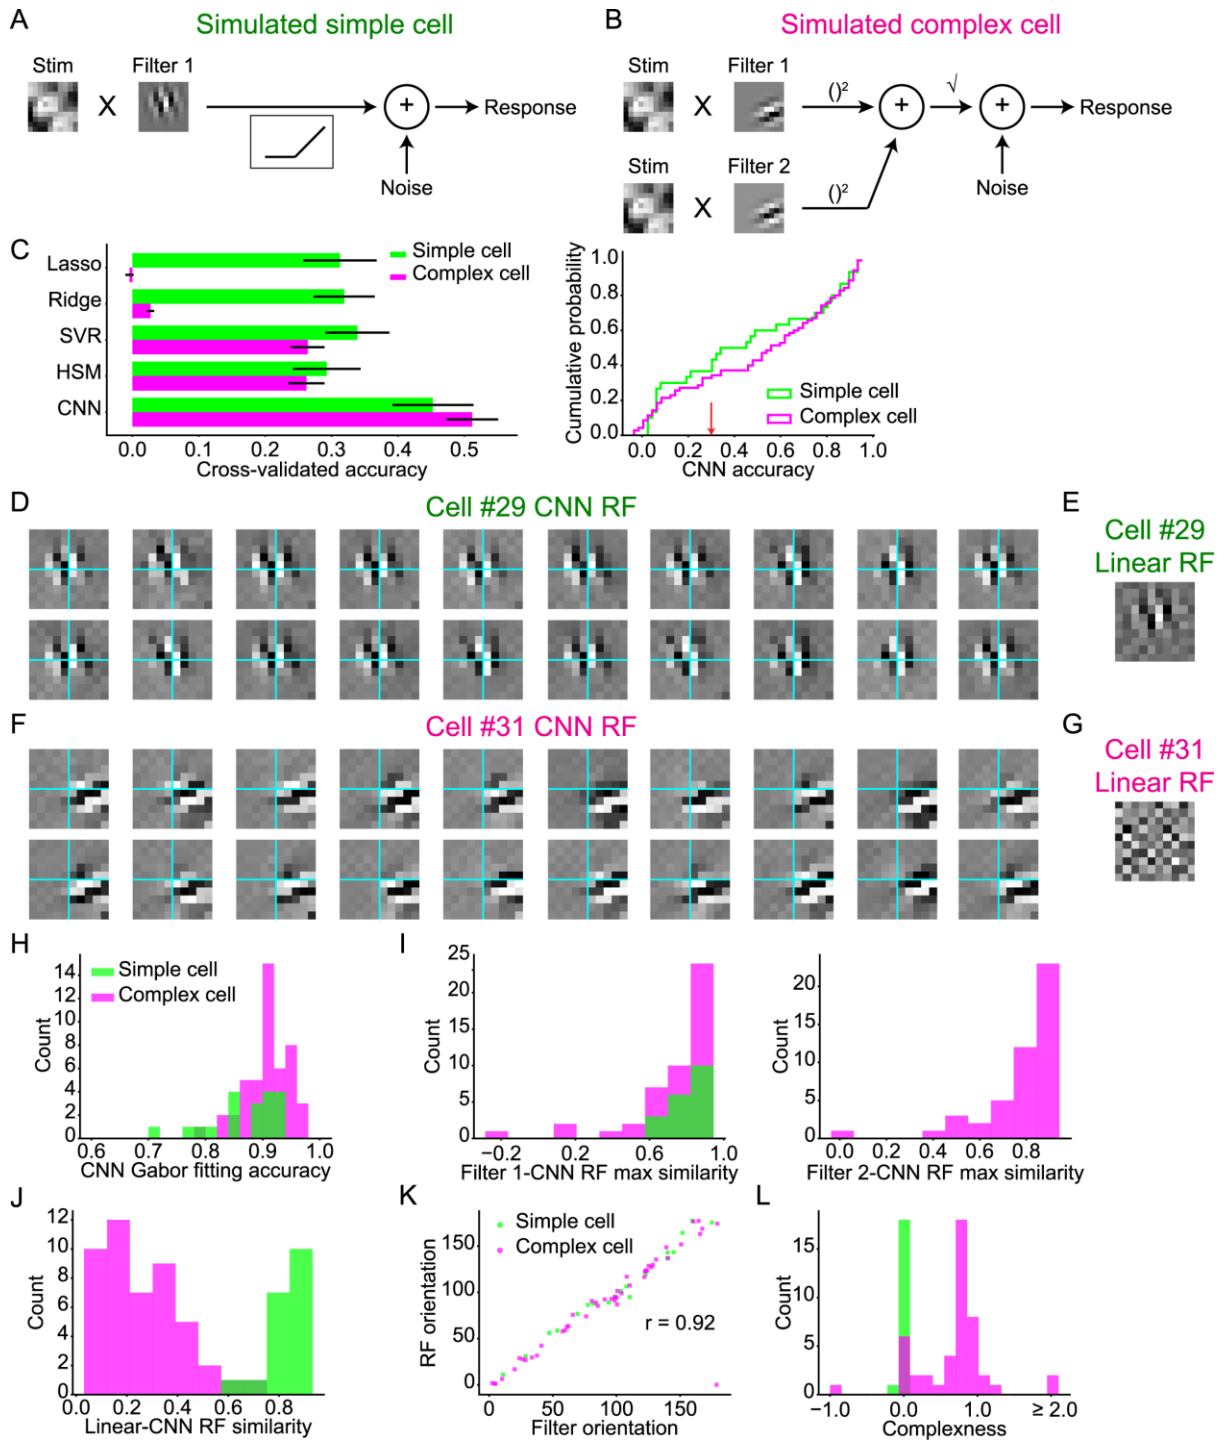

752

753 **Fig 2. Nonlinear RFs could be estimated by CNN encoding models for simulated simple cells and**  
 754 **complex cells.**

755 (A) Scheme of response generation for simulated simple cells. The response to a stimulus was defined as  
 756 the rectified dot product between the stimulus image and a Gabor-shaped filter, followed by an additive  
 757 Gaussian noise. The Gabor-shaped filter of simulated simple cell #29 is displayed in this panel. (B)

758 Scheme of response generation for simulated complex cells. The response to a stimulus was defined as the  
759 square root of the squared sum of the output of two subunits, followed by an additive Gaussian noise. Each  
760 subunit, which had a Gabor-shaped filter with a shifted phase, calculated the dot product between the  
761 stimulus image and the filter (See Materials and Methods for details). The Gabor-shaped filters of  
762 simulated complex cell #31 are displayed in this panel. (C) Left: comparison of the response prediction  
763 accuracies among the following encoding models: the L1-regularized linear regression model (Lasso),  
764 L2-regularized linear regression model (Ridge), support vector regression model (SVR), hierarchical  
765 structural model (HSM), and CNN. Data are presented as the mean  $\pm$  s.e.m. (N = 30 simulated simple cells  
766 and N = 70 simulated complex cells). Right: cumulative distribution of CNN prediction accuracy.  
767 Simulated cells with a CNN prediction accuracy  $\leq 0.3$  (indicated as the red arrow) were removed from the  
768 following receptive field (RF) analysis. (D, F) Results of iterative CNN RF estimations for simulated  
769 simple cell #29 (D) and complex cell #31 (F). Only 20 of the 100 generated RF images are shown in these  
770 panels. Grids are depicted in cyan. Although the simulated simple cell #29 had RFs in nearly identical  
771 positions, the simulated complex cell #31 had RFs in shifted positions. (E, G) Linearly estimated RFs (linear  
772 RFs) of simulated simple cell #29 (E) and complex cell #31 (G), using a regularized pseudoinverse method.  
773 (H) Gabor-fitting accuracy of CNN RFs. Accuracy was defined as the Pearson correlation coefficient  
774 between the CNN RF and fitted Gabor kernel. (I) Maximum similarity between each generator filter and  
775 100 CNN RFs. (J) Similarity between linear RFs and CNN RFs. Similarity was defined as the normalized  
776 pixelwise dot product between the linear RF and CNN RF. (K) Relationship of the Gabor orientations  
777 between generator filters and CNN RFs. (L) Distribution of complexness. Only cells with a CNN  
778 prediction accuracy  $> 0.3$  were analyzed in H–L (N = 19 simple cells and N = 47 complex cells).  
779



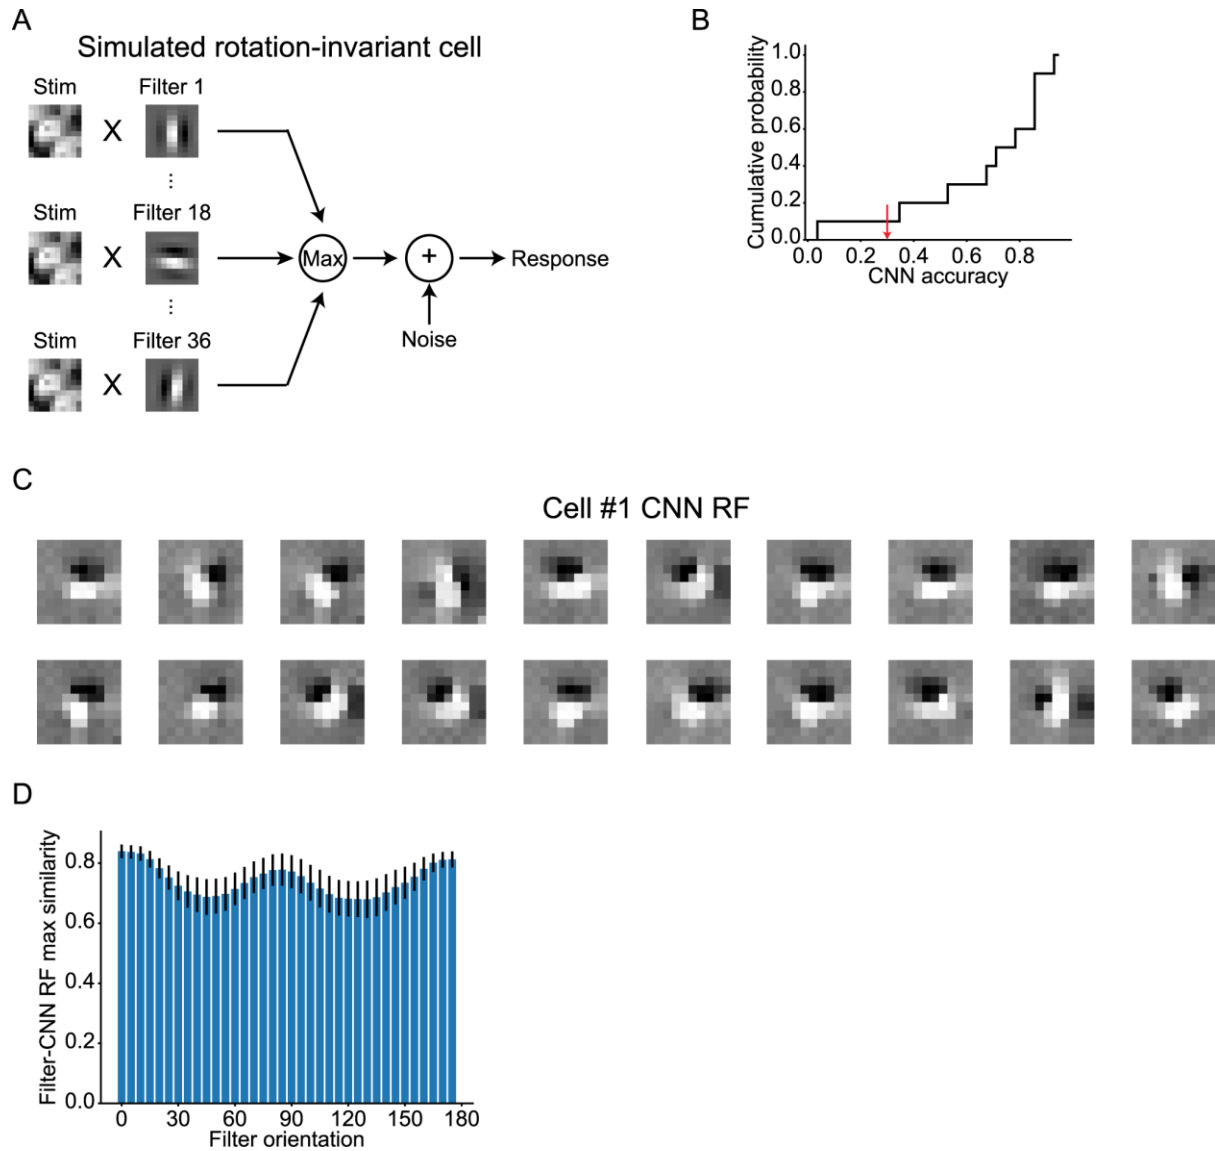

780

781 **Fig 3. Nonlinear RFs could be estimated by CNN encoding models for simulated rotation-invariant**  
782 **cells.**

783 (A) Scheme of response generation for simulated rotation-invariant cells. The response to a stimulus was  
784 defined as the maximum of the output of 36 subunits followed by an additive Gaussian noise. Each subunit,  
785 which had a Gabor-shaped filter with different orientations, calculated the dot product between the  
786 stimulus image and the filter (See Materials and Methods for details). The filters of simulated cell #1 are  
787 displayed in this panel. (B) Cumulative distribution of CNN prediction accuracy (N = 10 cells). Simulated  
788 cells with a CNN prediction accuracy  $\leq 0.3$  (indicated as the red arrow) were removed from the following  
789 RF analysis. (C) Results of iterative CNN RF estimations for simulated cell #1. Only 20 of the 1000

790 generated RF images are shown in this panel. RF images had Gabor-like shapes but their orientations were  
791 different in different iterations. (D) Maximum similarity between each generator filter and 1000 CNN RFs.  
792 Only cells with a CNN prediction accuracy  $> 0.3$  were analyzed (N = 9 cells).

793

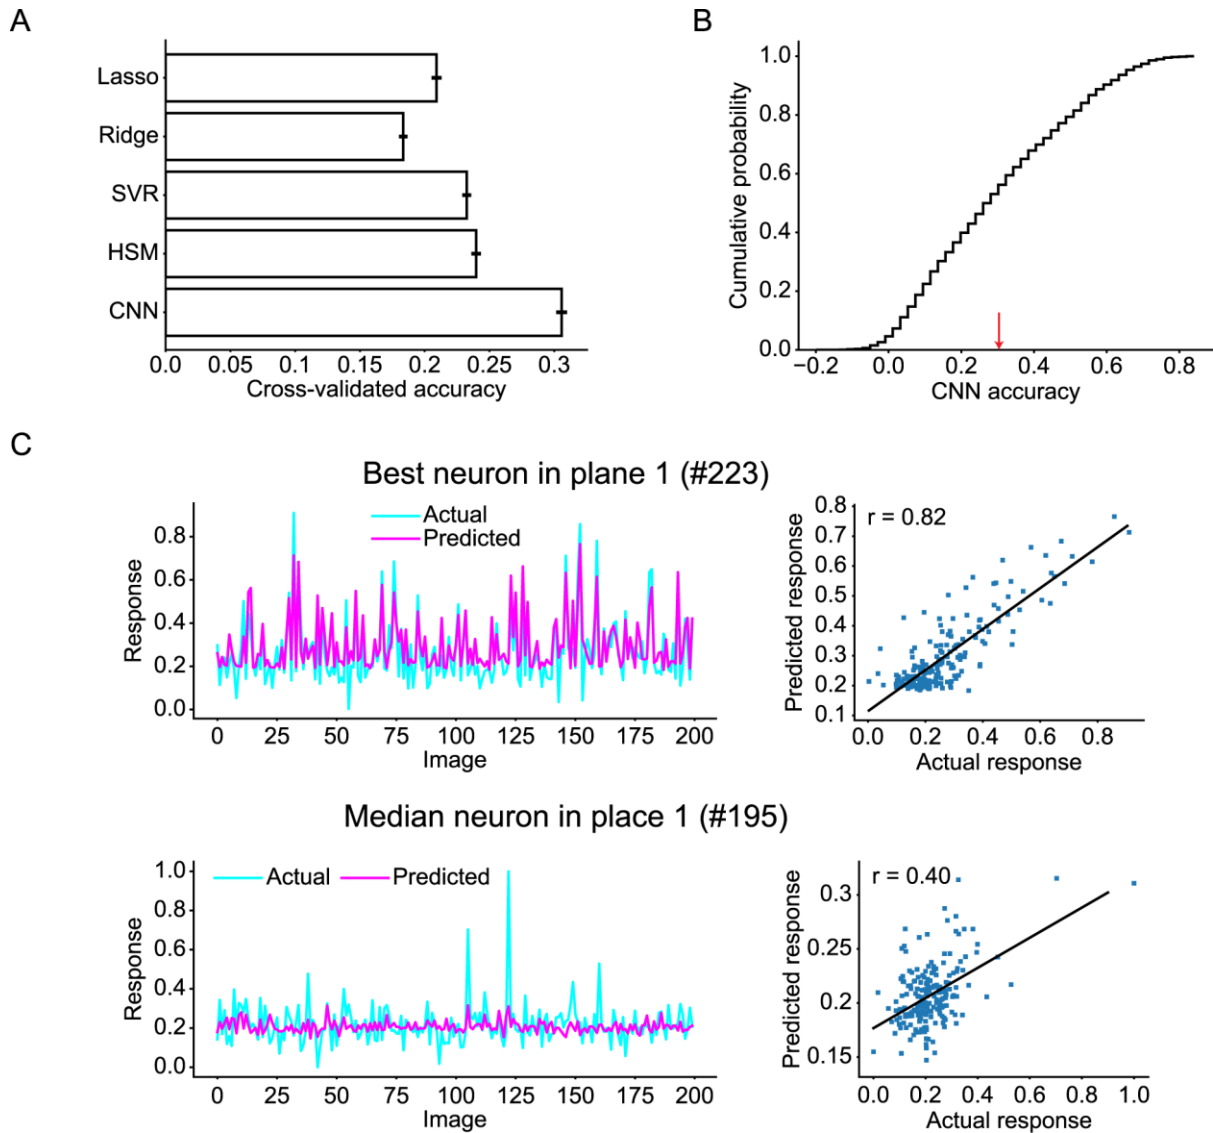

794

795 **Fig 4. Prediction accuracy of the CNN for V1 neurons.**

796 (A) Comparison of the response prediction accuracies among various encoding models: the L1-regularized  
797 linear regression model (Lasso), L2-regularized linear regression model (Ridge), SVR, HSM, and CNN.  
798 Data are presented as the mean  $\pm$  s.e.m. ( $N = 2455$  neurons). (B) Cumulative distribution of CNN  
799 prediction accuracy. Neurons with a CNN prediction accuracy  $\leq 0.3$  (indicated as the red arrow) were  
800 removed from the following RF analysis. (C) Distributions of actual responses and predicted responses of  
801 the neuron with the best prediction accuracy in a plane (top) and the neuron with the median prediction  
802 accuracy in a plane (bottom). Each dot in the right panel indicates data for each stimulus image. Solid lines  
803 in the right panels are the linear least-squares fit lines. Only data for 200 images are shown.

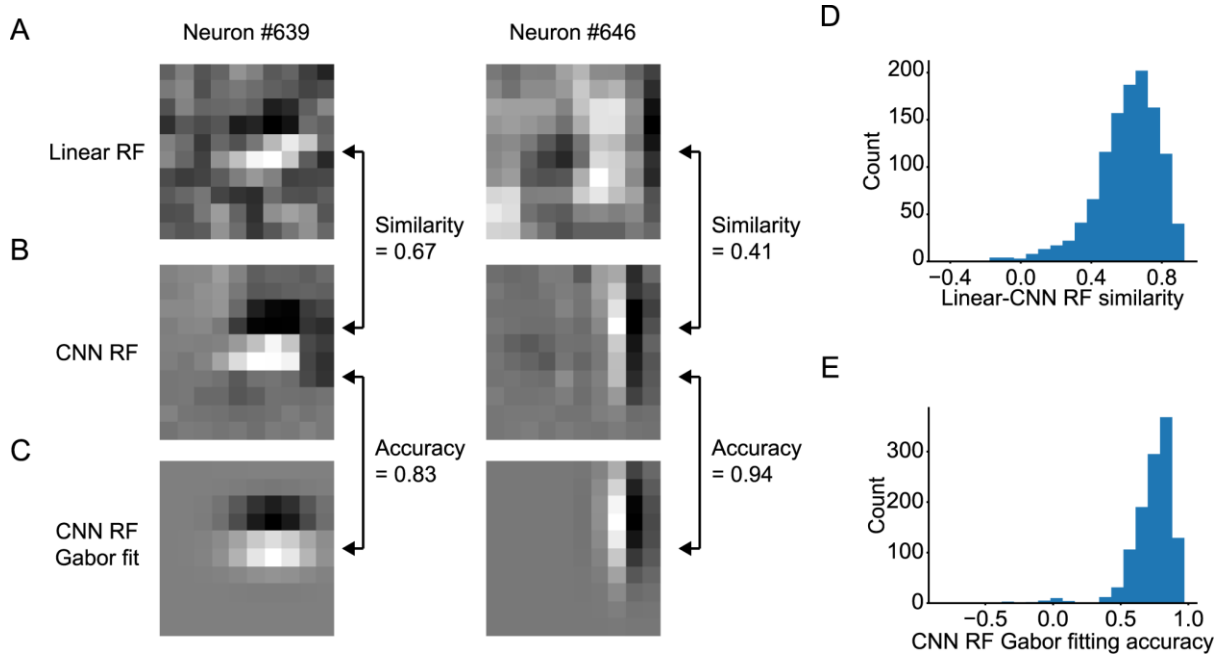

804

805 **Fig 5. Estimating RFs of V1 neurons from trained CNNs.**

806 (A) Linearly estimated RFs (linear RFs) of two representative neurons (#639 and #646), using a  
807 regularized pseudoinverse method. (B) RFs estimated from the trained CNNs (CNN RFs) of the two  
808 representative neurons. (C) Gabor kernels fitted to CNN RFs of the two representative neurons. (D)  
809 Similarity between linear RFs and CNN RFs. Similarity was defined as the normalized pixelwise dot  
810 product between the linear RF and the CNN RF. (E) Gabor fitting accuracy of CNN RFs. Accuracy was  
811 defined as the Pearson correlation coefficient between the CNN RF and the fitted Gabor kernel. Only  
812 neurons with a CNN prediction accuracy  $> 0.3$  were analyzed in D and E (N = 1160 neurons).

813

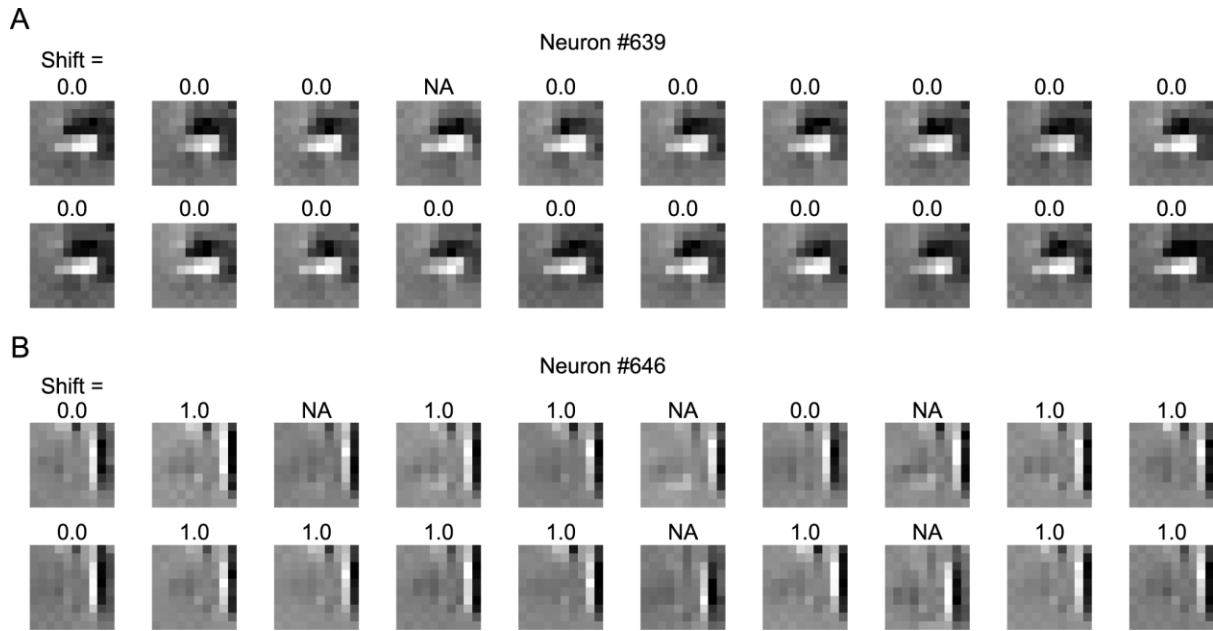

814

815 **Fig 6. Examples of iterative CNN RF estimation for V1 neurons.**

816 Results of iterative CNN RF estimations for neuron #639 (A) and neuron #646 (B). Only 20 out of the 100  
817 generated RF images are shown in this figure. The number above each RF image indicates the shift pixel  
818 distance between the RF image and the top left RF image. The shift distance between two images was  
819 calculated as the maximum distance of pixel shifts with which the zero-mean normalized cross correlation  
820 (ZNCC) > 0.95, projected orthogonally to the Gabor orientation. "NA" indicates that the ZNCC was not  
821 above 0.95 for any shift. While shift distances were zero or NA for RF images of neuron #639, some RF  
822 images of neuron #646 were shifted to another by one pixel.

823

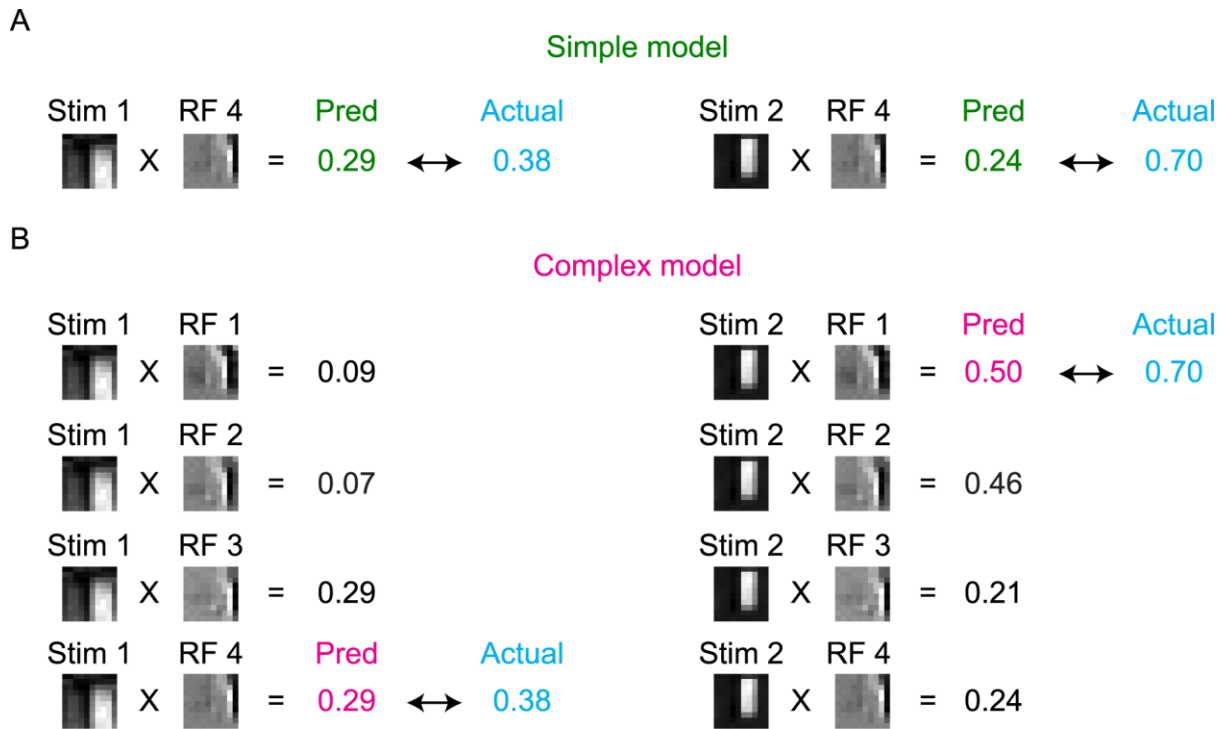

824

825 **Fig 7. Schemes of the simple model and complex model.**

826 Schemes of the simple model and complex model are illustrated using RFs and actual responses of neuron  
827 #646. (A) The simple model is a linear predictive model, which predicts the neuronal response as the  
828 normalized dot product between the stimulus image and one RF image (RF 4). (B) The complex model  
829 predicts the neuronal response as the maximum of the normalized dot products of the stimulus image and  
830 several RF images (RF 1–4). Note that the complex model predicted the neuronal response to Stim 2 better  
831 than the simple model for this neuron.

832

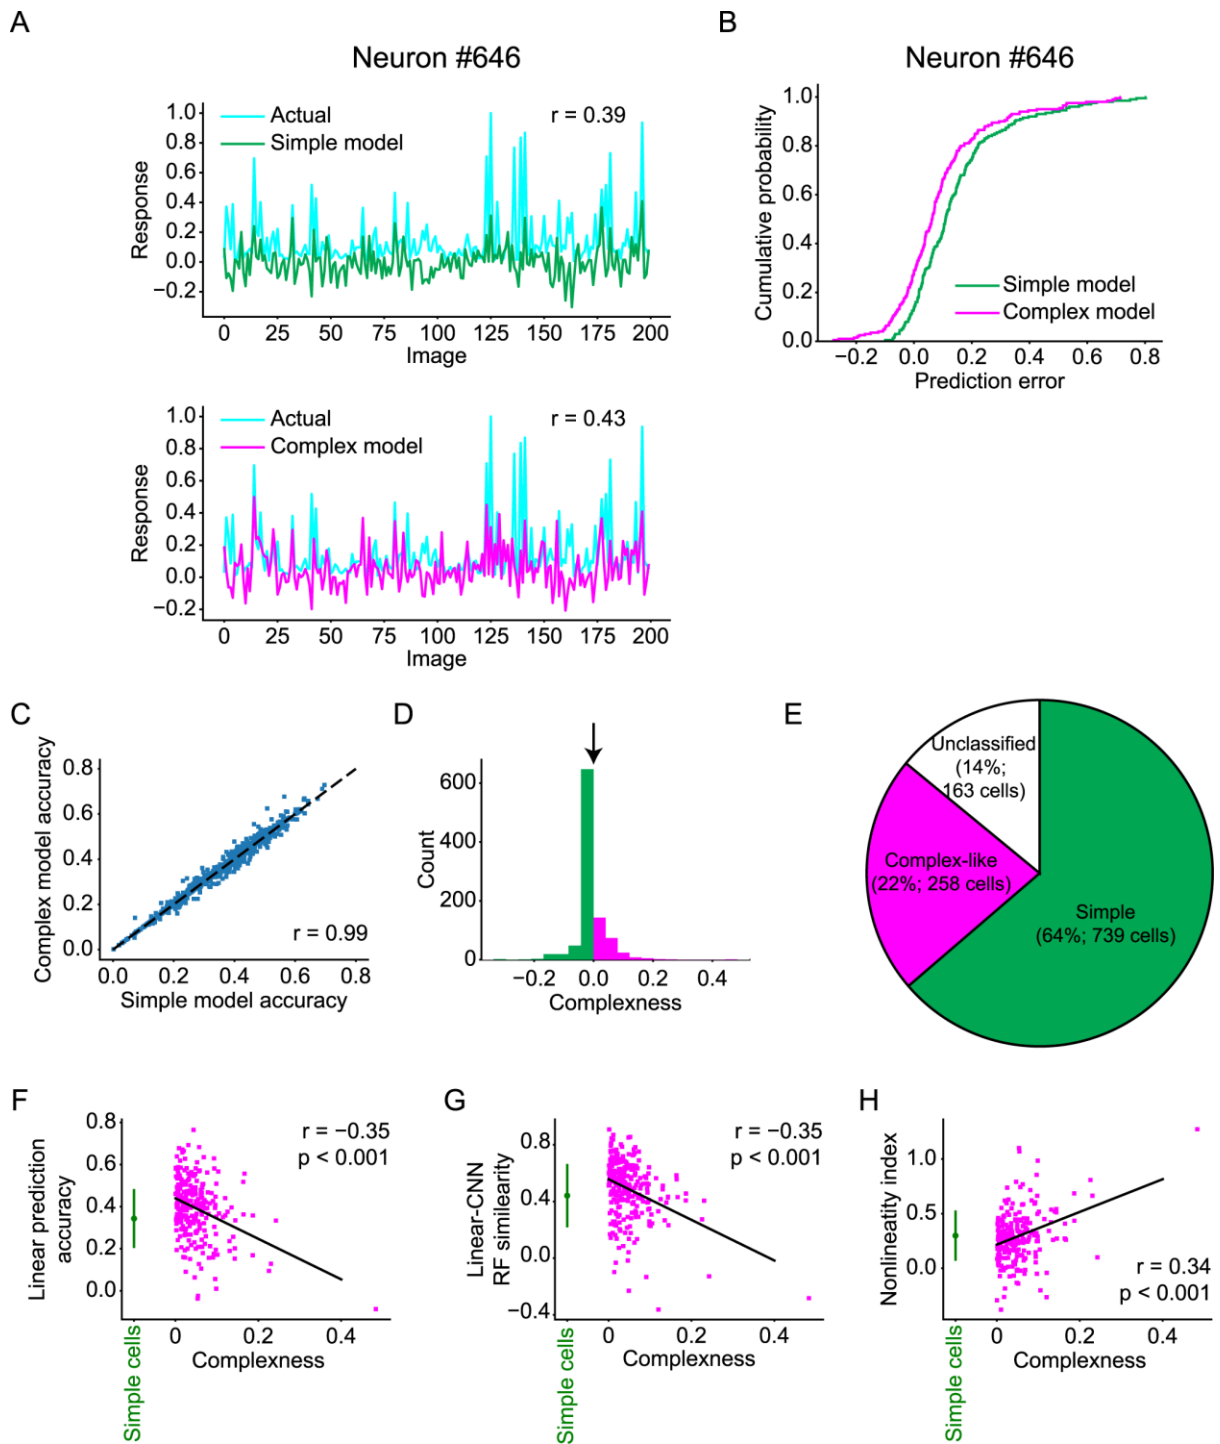

833

834 **Fig 8. Simple cells and complex-like cells.**

835 (A) Distributions of the actual responses (cyan lines) and responses predicted by the simple model (green

836 line in the top panel) and the complex model (magenta line in the bottom panel) for neuron #646. (B)

837 Cumulative distributions of prediction errors of the simple model (green) and the complex model

838 (magenta) for neuron #646. Prediction error was defined as the difference between the predicted response

839 and actual response. (C) Relationship of accuracies between the simple model and complex model (N =  
840 997 neurons). Neurons with the Gabor fitting accuracy  $\leq 0.6$ , accuracy of the simple model  $< 0$ , or  
841 accuracy of the complex model  $< 0$  were omitted from this analysis. (D) Distribution of complexness.  
842 Simple cells (green) and complex-like cells (magenta) were classified with threshold = 0 (black arrow). (E)  
843 Proportion of classified cells, simple cells, and complex-like cells among neurons with the CNN response  
844 prediction accuracy  $> 0.3$ . Classified cells were neurons with the Gabor fitting accuracy  $> 0.6$ , the response  
845 prediction accuracy of the simple model  $> 0$ , and the response prediction accuracy of the complex model  $>$   
846  $0$ . Simple cells were neurons with complexness  $\leq 0$ . Complex-like cells were neurons with complexness  $>$   
847  $0$ . (F–H) Relationships between complexness and linear (Lasso) prediction accuracy (F), similarity  
848 between linear RFs and CNN RFs (G), and the nonlinearity index (H). Data of simple cells are presented  
849 as the mean  $\pm$  s.d. (N = 739 neurons, green). Solid lines are the linear least-squares fit lines for  
850 complex-like cells. Both linear prediction accuracy and RF similarity of complex-like cells (magenta)  
851 negatively correlated with complexness ( $r = -0.35$ ,  $p < 0.001$ , N = 258 neurons: F and  $r = -0.29$ ,  $p < 0.001$ ,  
852 N = 258 neurons: G), while the nonlinearity index of complex-like cells positively correlated with  
853 complexness ( $r = 0.34$ ,  $p < 0.001$ , N = 258 neurons: H), suggesting that complexness defined here indeed  
854 reflected nonlinearity.  
855



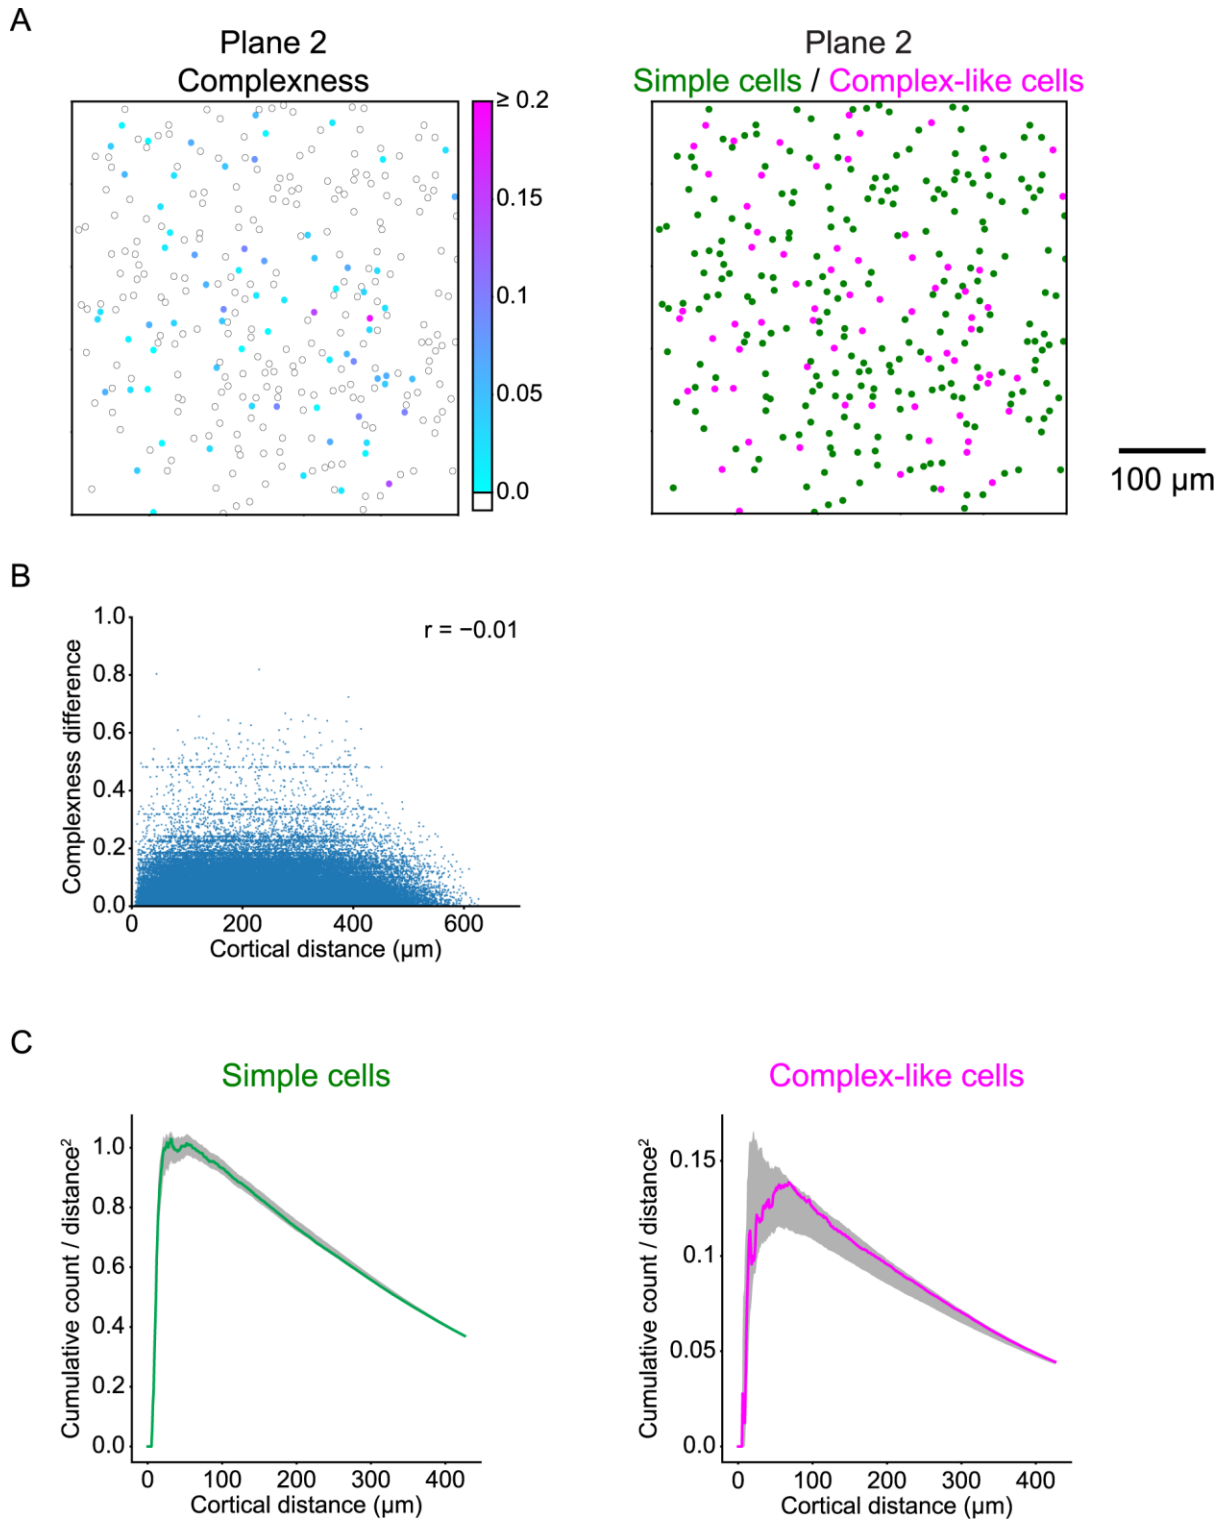

856

857 **Fig 9. Spatial organizations of simple cells and complex-like cells.**

858 (A) Left: cortical distribution of complexness for the representative plane. Position of each neuron is

859 represented as the circle annotated by the complexness (cyan to magenta for complex-like cells

860 (complexness  $> 0$ ) and white for simple cells (complexness  $\leq 0$ ). Right: cortical distribution of simple  
861 cells ( $N = 238$  neurons, green) and complex-like cells ( $N = 70$  neurons, magenta) for the representative  
862 plane. (B) Relationship between cortical distances and differences of complexness for all simple cells and  
863 complex-like cells. (C) Cumulative distributions of the number of simple cell-simple cell pairs (left) or  
864 complex-like cell-complex-like cell pairs (right) as a function of the cortical distance, normalized by the  
865 area. Dark shadows indicate the range from the first to 99<sup>th</sup> percentile of 1000 position-permuted  
866 simulations for each plane. The cumulative distributions were both within the first and 99<sup>th</sup> percentiles of  
867 simulations, indicating no distinct spatial arrangements of simple cells or complex-like cells.
